# Supplementary material for: Relative risk values of age, acrolein, IL-6 and CRP as markers of periventricular hyperintensities: a cross-sectional study
Source: PubMed Central journal article supplement — BMJ Open. 2014 Aug 13;4(8):e005598. doi: 10.1136/bmjopen-2014-005598 (PMC4139621; doi:10.1136/bmjopen-2014-005598), 2014-08-13
Supplement: bmjopen-2014-005598.draft_revisions.pdf [file bmjopen-2014-005598.draft_revisions.pdf]

# BMJ Open

## Relative risk values of age, acrolein, IL-6, and CRP as markers of periventricular hyperintensities

|                                 |                                                                                                                                                                                                                                                                                                                                                                                                                                                                                                                                                                                                                                               |
|---------------------------------|-----------------------------------------------------------------------------------------------------------------------------------------------------------------------------------------------------------------------------------------------------------------------------------------------------------------------------------------------------------------------------------------------------------------------------------------------------------------------------------------------------------------------------------------------------------------------------------------------------------------------------------------------|
| Journal:                        | <i>BMJ Open</i>                                                                                                                                                                                                                                                                                                                                                                                                                                                                                                                                                                                                                               |
| Manuscript ID:                  | bmjopen-2014-005598                                                                                                                                                                                                                                                                                                                                                                                                                                                                                                                                                                                                                           |
| Article Type:                   | Research                                                                                                                                                                                                                                                                                                                                                                                                                                                                                                                                                                                                                                      |
| Date Submitted by the Author:   | 09-May-2014                                                                                                                                                                                                                                                                                                                                                                                                                                                                                                                                                                                                                                   |
| Complete List of Authors:       | Abe, Arata; Nippon Medical School, epartment of Neurological Science, Graduate School of Medicine<br>Nishiyama, Y; Nippon Medical School, epartment of Neurological Science, Graduate School of Medicine<br>Abe-Harada, Mina; Nippon Medical School, epartment of Neurological Science, Graduate School of Medicine<br>Okubo, Seiji; Nippon Medical School, epartment of Neurological Science, Graduate School of Medicine<br>Ueda, Masayuki; Nippon Medical School, epartment of Neurological Science, Graduate School of Medicine<br>Katayama, Yasuo; Nippon Medical School, epartment of Neurological Science, Graduate School of Medicine |
| <b>Primary Subject Heading</b>: | Diagnostics                                                                                                                                                                                                                                                                                                                                                                                                                                                                                                                                                                                                                                   |
| Secondary Subject Heading:      | Neurology, Diagnostics                                                                                                                                                                                                                                                                                                                                                                                                                                                                                                                                                                                                                        |
| Keywords:                       | Stroke < NEUROLOGY, Neurology < INTERNAL MEDICINE, Stroke medicine < INTERNAL MEDICINE                                                                                                                                                                                                                                                                                                                                                                                                                                                                                                                                                        |
|                                 |                                                                                                                                                                                                                                                                                                                                                                                                                                                                                                                                                                                                                                               |

SCHOLARONE™  
Manuscripts

1  
2  
3  
4 1 **Relative risk values of age, acrolein, IL-6, and CRP as markers of periventricular**  
5  
6  
7 2 **hyperintensities: a cross-sectional study**  
8  
9  
10 3

11  
12 4 Arata Abe\*, Yasuhiro Nishiyama, Mina Harada-Abe, Seiji Okubo, Masayuki Ueda, Masahiro  
13  
14  
15 5 Mishina, Yasuo Katayama  
16  
17  
18 6

19  
20  
21 7 Department of Neurological Science, Graduate School of Medicine, Nippon Medical School, 1-1-5  
22  
23  
24 8 Sendagi, Bunkyo-ku, Tokyo 113-8603, Japan  
25  
26  
27 9

28  
29  
30 10 **Keywords:** Protein-conjugated acrolein, IL-6, CRP, Periventricular hyperintensity, White matter  
31  
32  
33 11 intensities, stroke  
34  
35  
36 12

37  
38  
39 13 **\*Corresponding Author:**

40  
41 14 Arata Abe

42  
43  
44 15 Department of Neurological Science, Graduate School of Medicine, Nippon Medical School

45  
46  
47 16 1-1-5 Sendagi, Bunkyo-ku, Tokyo 113-8603, Japan

48  
49  
50 17 Tel: +81-3-3822-2131

51  
52  
53 18 Fax: +81-3-3822-4865

54  
55  
56 19 Email: [abe@nms.ac.jp](mailto:abe@nms.ac.jp)  
57  
58  
59  
60

1  
2  
3  
4 20  
5  
6 21  
7  
8  
9  
10  
11  
12  
13  
14  
15  
16  
17  
18  
19  
20  
21  
22  
23  
24  
25  
26  
27  
28  
29  
30  
31  
32  
33  
34  
35  
36  
37  
38  
39  
40  
41  
42  
43  
44  
45  
46  
47  
48  
49  
50  
51  
52  
53  
54  
55  
56  
57  
58  
59  
60

For peer review only

1  
2  
3  
4 22 **Abstract**

5  
6 23 Objective: Brain white matter hyperintensities (WMHs) can be divided into periventricular  
7  
8  
9  
10 24 hyperintensity (PVH) and deep-and-subcortical white matter hyperintensity (DSWMH), and the  
11  
12 25 former contribute more to cognitive dysfunction and infarction risk. We conducted the present  
13  
14  
15 26 investigation to define the relationship between PVH and DSWMH.

16  
17  
18 27 Design: Cross-sectional study.

19  
20  
21 28 Setting: University hospital

22  
23  
24 29 Participants: We prospectively enrolled 228 healthy Japanese volunteer subjects with relative risk  
25  
26  
27 30 values (RRVs) > 0.5.

28  
29  
30 31 Primary outcome measures: We investigated whether it is possible to use the RRV to predict PVH  
31  
32  
33 32 and DSWMH.

34  
35  
36 33 Results: Among 228 subjects, 103 (45.1%) and 157 (68.8%) exhibited PVH and DSWMH,  
37  
38  
39 34 respectively. Age, body mass index (BMI), and PVH were significant independent determinants of  
40  
41  
42 35 RRV. A significant odds ratio (OR) for PVH was noted in the highest RRV tertile compared with the  
43  
44  
45 36 lowest one after adjusting for potential confounding factors. A significant OR for high predicted  
46  
47  
48 37 PVH risk was also found for RRV level as well.

49  
50  
51 38 Conclusion: Elevated RRV levels were significantly associated with increased predicted PVH,  
52  
53  
54 39 suggesting that measuring the plasma PCAcro, IL-6, and CRP levels may be useful for identifying  
55  
56  
57 40 Japanese at high risk for PVH.

1  
2  
3  
4 41 Strengths and limitations of this study:

5  
6  
7 42 Using the RRV at clinical level, we investigate to evaluate WMHs.

8  
9  
10 43 We provided the first evidence that RRV is associate with PVH rather than DSWMH.

11  
12 44 These data are obtained from cases of cautious health care in Asian people and may not be applicable  
13  
14  
15  
16 45 to populations of poor health.

17  
18  
19  
20  
21 47 **Keywords:** Protein-conjugated acrolein, IL-6, CRP, Periventricular hyperintensity

22  
23  
24 48

25  
26  
27 49 **1. Introduction**

28  
29  
30 50 A number of large-scale clinical studies have demonstrated that white matter hyperintensities

31  
32  
33 51 (WMHs) are associated with high stroke risk<sup>1-3</sup>. The results of the large-scale, multicenter open trial

34  
35  
36 52 PICA study<sup>4</sup> conducted in Japan suggest that the Fazekas-classified periventricular hyperintensities

37  
38  
39 53 (PVHs) and deep-and-subcortical white matter hyperintensities (DSWMHs)<sup>5</sup> are related to the risk of

40  
41  
42 54 symptomatic brain infarction (SBI). In the Rotterdam Scan study on elderly subjects with no history

43  
44  
45 55 of stroke, conducted by magnetic resonance imaging (MRI) for 4.2 years, the proportional hazard

46  
47  
48 56 ratio of stroke occurrence after adjustment of comorbid factors was 4.7 (95% confidence interval

49  
50  
51 57 [CI], 2.0–11.2) in PVH and 3.6 (CI, 1.4–9.2) in DSWMH<sup>6</sup>. Unlike DSWMH, PVH is associated with

52  
53  
54 58 cognitive dysfunction<sup>7</sup>. In other studies, associations were separately assessed for PVH and DSWMH

55  
56  
57 59 and was significant only for PVH, which was related to decreased processing speed and executive

1  
2  
3  
4 60 function<sup>8,9</sup>. Additionally, PVH predicted poorer functional outcome after stroke both in the acute  
5  
6  
7 61 and chronic phases, independently of DSWMH<sup>10,11</sup>. A Chiba University group reported that the  
8  
9  
10 62 relative risk value (RRV) measured based on protein-conjugated acrolein (PC-Acro) together with  
11  
12  
13 63 interleukin-6 (IL-6) and C-reactive protein (CRP) can be used to predict the stroke risk factors of  
14  
15  
16 64 silent brain infarction (SBI), carotid atherosclerosis (CA), and WMH with high sensitivity and  
17  
18  
19 65 specificity<sup>12</sup>. We measured plasma PCAcro, IL-6 and CRP, analyzed the measurements in  
20  
21  
22 66 conjunction with age to determine whether it is possible to use the RRV to predict PVH and  
23  
24  
25 67 DSWMH.

## 26 27 68 2. Materials and methods

### 28 29 30 69 2.1. Subjects and blood sampling

31  
32  
33 70 We examined 228 elderly volunteers (78 women and 150 men, age  $65.0 \pm 7.0$  years, range 31–83  
34  
35  
36 71 years). All these subjects were healthy volunteers living independently at home without apparent  
37  
38  
39 72 history of stroke, cardiovascular disease, or malignancy. Subjects with  $RRV > 0.5$  were enrolled  
40  
41  
42 73 prospectively. Informed consent was provided by each subject, and our study protocol was approved  
43  
44  
45 74 by the Ethics Committees of Nippon Medical School Hospital. Experiments were carried out in  
46  
47  
48 75 accordance with the Declaration of Helsinki principles. Blood samples were collected into tubes  
49  
50  
51 76 containing 3 U/mL heparin and centrifuged at  $1500 \times g$  for 10 min at 4°C.  
52

### 53 54 55 56 78 2.2. PC-Acro, IL-6, and CRP Measurements

1  
2  
3  
4 79 Blood samples were drawn from the antecubital vein after overnight fasting. PC-Acro  
5  
6  
7 80 [*N*-(3-formyl-3,4-dehydropiperidino)-lysine (FDPLysine) in protein] was determined as previously  
8  
9  
10 81 described<sup>13</sup> using an ACR-LYSINE ADDUCT ELISA SYSTEM (NOF Corporation, Tokyo, Japan)  
11  
12  
13 82 and 0.01 mL plasma. IL-6 and CRP were quantified using an Endogen Human IL-6 ELISA kit  
14  
15  
16 83 (Pierce Biotechnology, Inc., Rockford, IL, USA) and a human CRP ELISA kit (Alpha Diagnostic  
17  
18  
19 84 International, San Antonio, TX, USA), respectively, according to the manufacturers' protocols. After  
20  
21  
22 85 the reaction was terminated, absorbance was measured at 450 nm using a microplate reader  
23  
24  
25 86 (MTP-800APC, Hitachi, Tokyo, Japan). The biochemical markers from each subject were measured  
26  
27  
28 87 by an investigator who was blinded to the MRI results (Amine Pharma Research Institute, Chiba,  
29  
30  
31 88 Japan). Relative risk value (RRV) was calculated with artificial neural networks by back propagation  
32  
33  
34 89 method using NEUROSIM/L software version 4 (Fujitsu, Tokyo, Japan)<sup>14</sup>. Using the report by a  
35  
36  
37 90 Chiba University group, we worked out predictive RRV in the range of 0–1<sup>15 16</sup>, with the nil as the  
38  
39  
40 91 lowest value as an index of the degree of tissue damage. Values > 0.5 were considered to indicate  
41  
42  
43 92 WMH risk.

44  
45  
46 94 Standard enzymatic methods were used to measure the levels of serum total cholesterol,  
47  
48  
49 95 triglycerides, creatinine, and plasma glucose. Serum high-density lipoprotein (HDL) cholesterol level  
50  
51  
52 96 was measured with a direct method, and serum low-density lipoprotein (LDL) cholesterol level was  
53  
54  
55 97 calculated using Friedewald's formula in the 228 subjects with serum triglyceride levels < 400  
56  
57  
58 98 mg/dL<sup>17</sup>. Diabetes was defined as a fasting plasma glucose level  $\geq 126$  mg/dL or the use of

1  
2  
3 99 glucose-lowering medications. Dyslipidemia was defined as total cholesterol level  $\geq 220$  mg/dL,  
4  
5  
6 100 HDL cholesterol level  $< 40$  mg/dL and a triglyceride level  $\geq 150$  mg/dL, as well as the use of  
7  
8  
9 101 lipid-lowering medications. The estimated glomerular filtration rate (eGFR) was calculated for  
10  
11 102 Japanese men as recommended by the Japanese Society of Nephrology<sup>18</sup> and represented as: eGFR  
12  
13  
14 103  $(\text{mL}/\text{min}/1.73 \text{ m}^2) = 193 \times \text{serum creatinine}^{-1.094} \times \text{age}^{-0.287}$ .

### 17 104 2.3. Imaging

18  
19  
20 105 All 228 subjects underwent T1- and T2-weighted MRI and fluid-attenuated inversion recovery  
21  
22  
23 106 (FLAIR) at the Nippon Medical School Hospital, Japan, within 1 month after blood sampling. MRI  
24  
25  
26 107 was performed as described previously [10]. PVH and DSWMH were defined as hyperintense areas  
27  
28  
29 108 on T2 and FLAIR images without any abnormality on T1 [Fazekas,16] in subjects without  
30  
31  
32 109 neurological signs and/or symptoms. The 228 subjects were classified into 103 PVH subjects (38  
33  
34  
35 110 women and 65 men, aged  $68.2 \pm 6.0$  years, RRV  $0.75 \pm 0.11$ ) and 157 WMH subjects (61 women  
36  
37  
38 111 and 96 men, aged  $66.7 \pm 5.8$  years, RRV  $0.71 \pm 0.12$ ).

39  
40  
41 112

### 42 113 2.4. Statistics

43  
44  
45  
46 114 All statistical tests were performed using the JMP9.02 software program (SAS Institute, Cary, NC,  
47  
48  
49 115 USA). Continuous variables except for triglyceride levels were expressed as means  $\pm$  standard  
50  
51  
52 116 deviation (SD). Triglyceride levels were transformed to the common logarithm for statistical analysis  
53  
54  
55 117 and are expressed as the geometric mean because of their skewed distribution. Categorical data are  
56  
57  
58



1  
2  
3  
4 118 expressed as the number of subjects (percent of total). The clinical characteristics for each RRV  
5  
6  
7 119 tertile were compared by analysis of variance (ANOVA) for continuous variables and  $\chi^2$  test for  
8  
9  
10 120 categorical variables. The RRVs between the two groups were compared by Student's t-tests or by  
11  
12  
13 121 ANOVA followed by multiple comparisons with the Bonferroni correction between the two groups.  
14  
15  
16 122 Correlations between RRV and other variables were evaluated with the Pearson's moment correlation  
17  
18  
19 123 coefficient. Factors with a P value < 0.20 as determined by Pearson's correlation analysis were  
20  
21  
22 124 included in a multiple linear regression analysis to identify independent determinants of the RRV.  
23  
24  
25 125 Logistic regression analysis was performed to obtain the odds ratios (ORs) for PVH and DSWMH in  
26  
27  
28 126 the three tertiles. All statistical tests were two-sided, and a P value < 0.05 was considered as  
29  
30  
31 127 significant.

32  
33 128

### 34 35 36 129 3. Results

37  
38  
39 130 The study subjects were divided into tertiles according to RRV (0.50–0.62, 0.63–0.79, and 0.80–0.90  
40  
41  
42 131 from the lowest to highest tertile, respectively). The subjects' clinical characteristics are summarized  
43  
44  
45 132 in Table 1. The mean RRV of the entire subject population was  $0.71 \pm 0.13$ , and the mean age was 65  
46  
47  
48 133  $\pm 7$  years. Age, body mass index (BMI), diastolic blood pressure (BP), HDL cholesterol level,  
49  
50  
51 134 triglyceride level, eGFR, and current smoking status were significantly different among the groups.  
52  
53  
54 135 RRVs were significantly higher in subjects with older age, lower eGFR, or PVH (Table 1). A simple  
55  
56  
57 136 correlation analysis showed that RRV was significantly correlated with age, systolic BP, eGFR, and

1  
2  
3  
4 137 PVH (Table 2). Multiple linear regression analysis indicated that BMI ( $\beta = 0.0026$ ,  $P = 0.044$ ) and  
5  
6  
7 138 PVH ( $\beta = 0.0380$ ,  $P < 0.0001$ ) were significant independent determinants of RRV.  
8

9  
10 139 The results of logistic regression analysis of the association between PVH and RRV are shown in  
11  
12 140 Table 3. Significant, unadjusted ORs for PVH were noted in the third RRV tertile (5.26 [95% CI,  
13  
14  
15 141 2.66–10.78],  $P < 0.0001$ ), compared to the first tertile. After adjusting for model 1 (BMI, systolic BP,  
16  
17  
18 142 triglycerides, eGFR, and current smoking status) the ORs in the third RRV tertile remained  
19  
20  
21 143 significant (4.75 [95% CI, 2.33–10.05],  $P < 0.0001$ ). After adjusting for model 2, we found that the  
22  
23  
24 144 OR in the third RRV tertile 3 was significant (5.26 [95% CI, 2.65–10.83],  $P < 0.0001$ ). A significant  
25  
26  
27 145 relationship was observed between RRV and PVH ( $P < 0.05$ ) but no such significance was found  
28  
29  
30 146 between RRV and DSWMH (figure 1).  
31

32  
33 147

#### 34 35 36 148 4. Discussion

37  
38 149 The present study demonstrated a significant, positive correlation between RRV and PVH in healthy  
39  
40  
41 150 Japanese volunteers. Notably, the highest RRV level tertile showed a significantly higher OR for a  
42  
43  
44 151 high predicted PVH risk in comparison to the lowest tertile, even after adjusting for multiple  
45  
46  
47 152 confounding factors. These results suggest that RRV is associated with the estimated risk of PVH in  
48  
49  
50 153 healthy Japanese volunteers. A number of clinical and epidemiological studies have examined the  
51  
52  
53 154 predictive value of RRV for the presence of WMH<sup>15 16</sup>. However, those studies assessed WMH  
54  
55  
56 155 prevalence; no studies have shown any significant association of RRV with PVH and DSWMH  
57  
58  
59  
60

1  
2  
3  
4 156 separately. In this regard, our results raise the possibility that RRV predicts the risk of PVH in the  
5  
6  
7 157 healthy Japanese population. With respect to age, these biochemical markers provide a good index of  
8  
9  
10 158 the presence of tissue damage related to PVH.

11  
12  
13 159 More recent studies focused on WMH location have reported that functional impairment within 1–3  
14  
15  
16 160 months after stroke correlated with PVH but not with DSWMH<sup>10 19</sup>. PVH WMH, especially PVH,  
17  
18  
19 161 has impacts on early functional recovery after ischemic stroke regardless of the initial stroke severity  
20  
21  
22 162 and other cardiovascular risk factors<sup>11</sup>. Other groups found a significant association between PVH  
23  
24  
25 163 and decreases in processing speed and executive function, but there was no such relationship with  
26  
27  
28 164 DSWMH<sup>8 9</sup>. Why PVH and DSWMH have different relationships with stroke outcome remains  
29  
30  
31 165 unclear, but several theories have been put forward. DSWMH predominantly disrupt short  
32  
33  
34 166 association fibers that link adjacent gyri, while PVH affects long association fibers that connect the  
35  
36  
37 167 more distant cortical areas<sup>20</sup>. Thus, lesions in various white matter locations may disconnect from  
38  
39  
40 168 different neural networks that affect neural repair processes after stroke<sup>21</sup>. In addition, PVHs are  
41  
42  
43 169 related to diminished cerebral vasomotor reactivity and subsequent occurrence of cerebral  
44  
45  
46 170 hypoperfusion<sup>22</sup>, while DSWMHs are generally associated with microangiopathy<sup>23</sup>. It is clear that  
47  
48  
49 171 regional hypoperfusion is a good predictor of functional outcome<sup>24</sup>. These findings shed light on  
50  
51  
52 172 why PVH can predict functional stroke outcome and specific cognitive functions<sup>11</sup>.

53  
54  
55 173 Acrolein induces IL-6 production in astrocytes, macrophages, and endothelial cells, while IL-6  
56  
57  
58 174 induces CRP production in hepatocytes. Then, CRP stimulates IL-6 production, and IL-6 decreases

1  
2  
3  
4 175 acrolein toxicity <sup>25</sup>. Acrolein was thought to be one of the toxic compounds produced from  
5  
6  
7 176 unsaturated fatty acids by active oxygen species such as superoxide anion radical, hydrogen peroxide,  
8  
9  
10 177 and hydroxyl radical<sup>13</sup>. These findings may partially explain the pathophysiological mechanisms  
11  
12  
13 178 underlying the association between PVH and the three biomarkers assessed in the present study.  
14  
15 179 Further investigation will be needed for a better understanding of their interrelationship.  
16  
17

18  
19  
20  
21  
22  
23  
24  
25  
26  
27  
28  
29  
30  
31  
32  
33  
34  
35  
36  
37  
38  
39  
40  
41  
42  
43

181 Our multiple linear regression analysis showed that RRV was independently associated with BMI  
182 and PVH. Although obesity is believed to be an independent cardiovascular risk factor <sup>26</sup>, it is still  
183 controversial whether BMI is a significant risk factor for stroke <sup>27 28</sup>. BMI was previously reported to  
184 be correlated with high RRV <sup>29</sup> which may be caused by vascular degeneration and endothelial  
185 dysfunction associated with hypertension and metabolic disorders. Subjects with metabolic  
186 syndrome are generally defined as those who have abdominal obesity and two additional metabolic  
187 disorders including hypertension, dyslipidemia, and hyperglycemia <sup>30 31</sup>.

44  
45  
46  
47  
48  
49  
50  
51  
52  
53  
54  
55  
56  
57  
58  
59  
60

188  
189 Our study has some potential limitations. Because it was a cross-sectional investigation, we could not  
190 determine a causal relationship between increased RRV and PVH risk. In addition, the population  
191 included healthy Japanese volunteers only. Therefore, it is unclear whether the results can be  
192 extrapolated to other populations of poor health, patients with cardiovascular diseases, or other  
193 ethnic groups. Despite these potential limitations, our findings support the conclusion that elevated

1  
2  
3  
4 194 RRV is significantly associated with PVH in healthy Japanese volunteers. These results suggest that  
5  
6  
7 195 RRV measurement may be useful for identifying PVH in the general population. This would allow  
8  
9  
10 196 clinicians to follow patients who may be at risk for stroke and cognitive dysfunction.

11  
12  
13 197

14  
15  
16 198 **Acknowledgments**

17  
18 199 We thank Drs. Mari Adachi and Sadaji Kura at Katsushika Health Center for assisting with the data  
19  
20  
21 200 analyses.

22  
23  
24 201 **Contributorship Statement**

25  
26  
27 202 Conception and design: AA

28  
29  
30 203 Analysis and interpretation: YN, MHA, SO, MU

31  
32  
33 204 Writing the article: AA

34  
35  
36 205 Critical revision of the article: YN, MM, YK

37  
38  
39 206 Final approval of the article: YN, MHA, SO, MU, MM, YK

40  
41  
42 207 Statistical analysis: YN, MM

43  
44  
45 208 Overall responsibility: AA

46  
47 209 **Competing Interests**

48  
49  
50 210 None

51  
52  
53 211 **Data Sharing Statement**

54  
55  
56 212 No additional data available

Table 1. Characteristics of the study subjects due to their stroke risk marker level tertile

| Item                                        | All            | Silent brain infarction RRV tertile |                |               | P value* |
|---------------------------------------------|----------------|-------------------------------------|----------------|---------------|----------|
|                                             |                | Tertile 1                           | Tertile 2      | Tertile 3     |          |
| Subjects (n)                                | 228            | 76                                  | 73             | 79            | -        |
| Silent brain infarction relative risk value | 0.71 ± 0.13    | 0.51–0.07**                         | 0.69–0.05**    | 0.86–0.03**   | -        |
| Age (years)                                 | 65 ± 7         | 59 ± 7                              | 66 ± 3         | 70 ± 6        | <0.0001  |
| Male Sex                                    | 150 (65.7)     | 51 (67.1)                           | 52 (71.2)      | 47 (59.4)     | 0.299    |
| Body mass index, kg/m <sup>2</sup>          | 24.2 ± 6.4     | 23.2 ± 2.9                          | 24.6 ± 6.3     | 24.8 ± 8.6    | 0.133    |
| Systolic BP, mmHg                           | 123 ± 15       | 121 ± 14                            | 122 ± 14       | 126 ± 17      | 0.275    |
| Diastolic BP, mmHg                          | 75 ± 11        | 75 ± 9                              | 75 ± 10        | 75 ± 13       | 0.947    |
| Hypertension, n (%)                         | 81 (35.6)      | 23 (30.6)                           | 20 (27.4)      | 38 (48.1)     | 0.015    |
| Total cholesterol, mg/dL                    | 208 ± 32       | 208 ± 30                            | 208 ± 32       | 207 ± 34      | 0.903    |
| LDL cholesterol <sup>†</sup> , mg/dL        | 123 ± 29       | 123 ± 25                            | 123 ± 29       | 122 ± 33      | 0.848    |
| HDL cholesterol, mg/dL                      | 58 ± 15        | 59 ± 17                             | 57 ± 13        | 60 ± 16       | 0.385    |
| Triglycerides <sup>††</sup> , mg/dL         | 125 (113, 138) | 141 (111, 172)                      | 123 (105, 142) | 112 (99, 124) | 0.425    |

|                                    |             |             |             |             |         |
|------------------------------------|-------------|-------------|-------------|-------------|---------|
| Dyslipidemia, n (%)                | 55 (24.1)   | 19 (25.0)   | 13 (17.8)   | 23 (29.1)   | 0.259   |
| Fasting plasma glucose, mg/dL      | 100 ± 16    | 100 ± 14    | 99 ± 18     | 100 ± 15    | 0.754   |
| Diabetes, n (%)                    | 18 (7.8)    | 3 (3.9)     | 6 (8.2)     | 9 (11.3)    | 0.226   |
| eGFR (mL/min/1.73 m <sup>2</sup> ) | 67.6 ± 12.5 | 70.2 ± 15.3 | 67.3 ± 10.6 | 65.4 ± 10.6 | 0.027   |
| Current smoking status, n (%)      | 40 (17.5)   | 16 (21.0)   | 12 (16.4)   | 12 (15.1)   | 0.603   |
| PVH, n (%)                         | 103 (45.1)  | 18 (23.6)   | 36 (49.3)   | 49 (62.0)   | <0.0001 |
| DSWMH, n (%)                       | 157 (68.8)  | 52 (68.4)   | 50 (68.4)   | 55 (69.6)   | 0.983   |

\*Analysis of variance or chi-square test among the ADMA tertile. \*\*Range of a minimum-to-maximum stroke risk marker in each tertile. †n =

228. ††Geometric mean (95% confidence intervals). ‡Statistical analysis was not conducted because of the extremely small number of subjects in each category. BP, blood pressure; DSWMH, deep-and-subcortical white matter hyperintensity; eGFR, estimated glomerular filtration rate; HDL, high-density lipoprotein; LDL, low-density lipoprotein; PVH, periventricular hyperintensity; RRV, relative risk value

Table 2. Correlation coefficients and multiple linear regression analysis of relative risk value with the clinical parameters

| Item                             | Simple correlation analysis |         | Multiple linear regression analysis             |         |
|----------------------------------|-----------------------------|---------|-------------------------------------------------|---------|
|                                  | Correlation coefficient (r) | P-value | Standardized regression coefficient ( $\beta$ ) | P value |
| Age                              | 0.60                        | <0.0001 | †                                               |         |
| Male Sex                         | 0.05                        | 0.347   | ††                                              |         |
| BMI                              | 0.11                        | 0.075   | 0.0026                                          | 0.044   |
| Systolic BP                      | 0.14                        | 0.026   | 0.0009                                          | 0.075   |
| Diastolic BP                     | 0.05                        | 0.382   | ††                                              |         |
| Total cholesterol                | -0.03                       | 0.618   | ††                                              |         |
| LDL cholesterol*                 | -0.02                       | 0.669   | ††                                              |         |
| HDL cholesterol                  | 0.02                        | 0.731   | ††                                              |         |
| Triglycerides**                  | -0.10                       | 0.130   | -0.0001                                         | 0.083   |
| Fasting plasma glucose           | 0.01                        | 0.841   | ††                                              |         |
| eGFR                             | -0.13                       | 0.041   | -0.0008                                         | 0.235   |
| Current smoking status (Yes = 1) | -0.10                       | 0.115   | -0.0161                                         | 0.158   |
| PVH (Yes = 1)                    | 0.26                        | <0.0001 | 0.0380                                          | <0.0001 |
| DSWMH (Yes = 1)                  | 0.02                        | 0.689   | ††                                              |         |

\* n = 228. \*\* Log-transformed value. † Not included in the multiple linear regression analysis to avoid multicollinearity with PVH relative risk value.

†† Not included in the multiple linear regression analysis because their P values were  $\geq 0.20$  in the simple correlation analysis. BMI, body mass index; BP, blood pressure; DSWMH, deep-and-subcortical white matter hyperintensity; eGFR, estimated glomerular filtration rate; HDL, high-density lipoprotein; LDL, low-density lipoprotein.



Table 3. Unadjusted and adjusted PVH ORs in each silent brain infarction relative risk value tertile

| Item      | Unadjusted |            |         | Adjusted* |            |         | Adjusted** |            |         |
|-----------|------------|------------|---------|-----------|------------|---------|------------|------------|---------|
|           | OR         | 95% CI     | P-value | OR        | 95% CI     | P value | OR         | 95% CI     | P value |
| Tertile 1 | 1.00       | reference  | -       | 1.00      | reference  | -       | 1.00       | reference  | -       |
| Tertile 2 | 3.13       | 1.57–6.41  | 0.0014  | 3.68      | 1.77–7.97  | 0.0004  | 2.95       | 1.11–8.35  | 0.02    |
| Tertile 3 | 5.26       | 2.66–10.78 | <0.0001 | 4.75      | 2.33–10.05 | <0.0001 | 5.26       | 2.65–10.83 | <0.0001 |

\* Adjusted for BMI, systolic BP, triglycerides, eGFR, and current smoking status

\*\* Adjusted for BMI

BMI, body mass index; BP, blood pressure; eGFR, estimated glomerular filtration rate; OR, odds ratio; PVH, periventricular hyperintensity

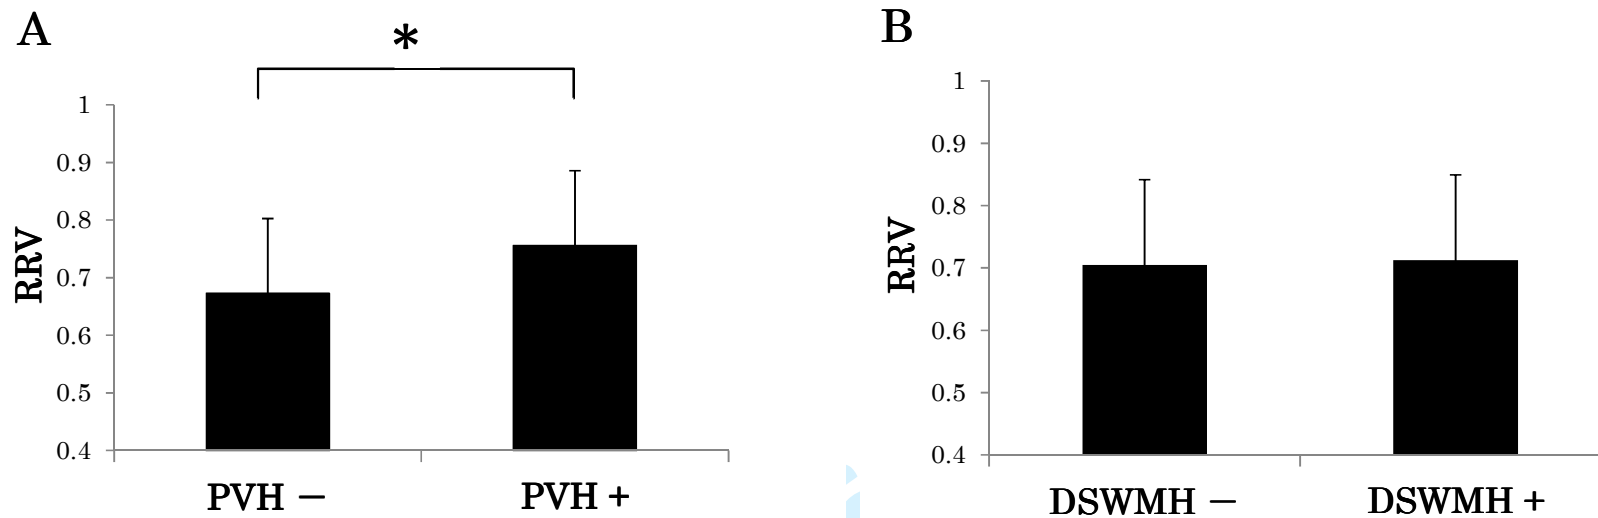

Figure 1. Correlation between the RRV and the PVH (A). Correlation between the RRV and DSWMH (B)

\*Significant at  $P < 0.05$

## References

1. Wong TY, Klein R, Sharrett AR, Couper DJ, Klein BE, Liao DP, et al. Cerebral white matter lesions, retinopathy, and incident clinical stroke. *Jama* 2002;288(1):67-74.
2. Gouw AA, van der Flier WM, Fazekas F, van Straaten EC, Pantoni L, Poggesi A, et al. Progression of white matter hyperintensities and incidence of new lacunes over a 3-year period: the Leukoaraiosis and Disability study. *Stroke* 2008;39(5):1414-20.
3. Bokura H, Yamaguchi S, Kobayashi S. Electrophysiological correlates for response inhibition in a Go/NoGo task. *Clin Neurophysiol* 2001;112(12):2224-32.
4. Shinohara Y, Tohgi H, Hirai S, Terashi A, Fukuuchi Y, Yamaguchi T, et al. Effect of the Ca antagonist nilvadipine on stroke occurrence or recurrence and extension of asymptomatic cerebral infarction in hypertensive patients with or without history of stroke (PICA Study). 1. Design and results at enrollment. *Cerebrovasc Dis* 2007;24(2-3):202-9.
5. Schmidt R, Fazekas F, Kapeller P, Schmidt H, Hartung HP. MRI white matter hyperintensities: three-year follow-up of the Austrian Stroke Prevention Study. *Neurology* 1999;53(1):132-9.
6. Vermeer SE, Hollander M, van Dijk EJ, Hofman A, Koudstaal PJ, Breteler MM. Silent brain infarcts and white matter lesions increase stroke risk in the general population: the Rotterdam Scan Study. *Stroke* 2003;34(5):1126-9.
7. Fukuda H, Kobayashi S, Okada K, Tsunematsu T. Frontal white matter lesions and dementia in lacunar infarction. *Stroke* 1990;21(8):1143-9.
8. van den Heuvel DM, ten Dam VH, de Craen AJ, Admiraal-Behloul F, Olofsen H, Bollen EL, et al. Increase in periventricular white matter hyperintensities parallels decline in mental processing speed in a non-demented elderly population. *J Neurol Neurosurg Psychiatry* 2006;77(2):149-53.
9. Debette S, Bombois S, Bruandet A, Delbeuck X, Lepoittevin S, Delmaire C, et al. Subcortical hyperintensities are associated with cognitive decline in patients with mild cognitive impairment. *Stroke* 2007;38(11):2924-30.
10. Kissela B, Lindsell CJ, Kleindorfer D, Alwell K, Moomaw CJ, Woo D, et al. Clinical prediction of functional outcome after ischemic stroke: the surprising importance of periventricular white matter disease and race. *Stroke* 2009;40(2):530-6.
11. Liou LM, Chen CF, Guo YC, Cheng HL, Lee HL, Hsu JS, et al. Cerebral white matter hyperintensities predict functional stroke outcome. *Cerebrovasc Dis* 2010;29(1):22-7.
12. O'Leary DH, Polak JF, Kronmal RA, Manolio TA, Burke GL, Wolfson SK, Jr. Carotid-artery intima and media thickness as a risk factor for myocardial infarction and stroke in older adults. Cardiovascular Health Study Collaborative Research Group. *N Engl J Med* 1999;340(1):14-22.
13. Uchida K, Kanematsu M, Morimitsu Y, Osawa T, Noguchi N, Niki E. Acrolein is a product of lipid peroxidation reaction. Formation of free acrolein and its conjugate with lysine residues in oxidized low density lipoproteins. *J Biol Chem* 1998;273(26):16058-66.
14. Ellenius J, Groth T, Lindahl B, Wallentin L. Early assessment of patients with suspected acute myocardial infarction by biochemical monitoring and neural network analysis. *Clin Chem* 1997;43(10):1919-25.
15. Yoshida M, Tomitori H, Machi Y, Katagiri D, Ueda S, Horiguchi K, et al. Acrolein, IL-6 and CRP as markers of silent brain infarction. *Atherosclerosis* 2009;203(2):557-62.
16. Yoshida M, Higashi K, Kobayashi E, Saeki N, Wakui K, Kusaka T, et al. Correlation between images of silent brain infarction, carotid atherosclerosis and white matter hyperintensity, and plasma levels of acrolein, IL-6 and CRP. *Atherosclerosis* 2010;211(2):475-9.

17. Friedewald WT, Levy RI, Fredrickson DS. Estimation of the concentration of low-density lipoprotein cholesterol in plasma, without use of the preparative ultracentrifuge. *Clin Chem* 1972;18(6):499-502.
18. Matsuo S, Imai E, Horio M, Yasuda Y, Tomita K, Nitta K, et al. Revised equations for estimated GFR from serum creatinine in Japan. *Am J Kidney Dis* 2009;53(6):982-92.
19. Kang HJ, Stewart R, Park MS, Bae KY, Kim SW, Kim JM, et al. White matter hyperintensities and functional outcomes at 2 weeks and 1 year after stroke. *Cerebrovasc Dis* 2013;35(2):138-45.
20. Brodal P. *The central nervous system : structure and function*. 3rd ed. Oxford: Oxford University Press, 2004.
21. Chollet F, DiPiero V, Wise RJ, Brooks DJ, Dolan RJ, Frackowiak RS. The functional anatomy of motor recovery after stroke in humans: a study with positron emission tomography. *Ann Neurol* 1991;29(1):63-71.
22. Gerdes VE, Kwa VI, ten Cate H, Brandjes DP, Buller HR, Stam J. Cerebral white matter lesions predict both ischemic strokes and myocardial infarctions in patients with established atherosclerotic disease. *Atherosclerosis* 2006;186(1):166-72.
23. Fazekas F, Kleinert R, Offenbacher H, Schmidt R, Kleinert G, Payer F, et al. Pathologic correlates of incidental MRI white matter signal hyperintensities. *Neurology* 1993;43(9):1683-9.
24. Giubilei F, Lenzi GL, Di Piero V, Pozzilli C, Pantano P, Bastianello S, et al. Predictive value of brain perfusion single-photon emission computed tomography in acute ischemic stroke. *Stroke* 1990;21(6):895-900.
25. Saiki R, Hayashi D, Ikuo Y, Nishimura K, Ishii I, Kobayashi K, et al. Acrolein stimulates the synthesis of IL-6 and C-reactive protein (CRP) in thrombosis model mice and cultured cells. *J Neurochem* 2013.
26. Poirier P, Giles TD, Bray GA, Hong Y, Stern JS, Pi-Sunyer FX, et al. Obesity and cardiovascular disease: pathophysiology, evaluation, and effect of weight loss: an update of the 1997 American Heart Association Scientific Statement on Obesity and Heart Disease from the Obesity Committee of the Council on Nutrition, Physical Activity, and Metabolism. *Circulation* 2006;113(6):898-918.
27. Haapaniemi H, Hillbom M, Juvela S. Lifestyle-associated risk factors for acute brain infarction among persons of working age. *Stroke* 1997;28(1):26-30.
28. Rexrode KM, Hennekens CH, Willett WC, Colditz GA, Stampfer MJ, Rich-Edwards JW, et al. A prospective study of body mass index, weight change, and risk of stroke in women. *Jama* 1997;277(19):1539-45.
29. Yoshida M, Mizoi M, Saiki R, Kobayashi E, Saeki N, Wakui K, et al. Relationship between metabolic disorders and relative risk values of brain infarction estimated by protein-conjugated acrolein, IL-6 and CRP together with age. *Clin Chim Acta* 2011;412(3-4):339-42.
30. Ninomiya JK, L'Italien G, Criqui MH, Whyte JL, Gamst A, Chen RS. Association of the metabolic syndrome with history of myocardial infarction and stroke in the Third National Health and Nutrition Examination Survey. *Circulation* 2004;109(1):42-6.
31. Kwon HM, Kim BJ, Lee SH, Choi SH, Oh BH, Yoon BW. Metabolic syndrome as an independent risk factor of silent brain infarction in healthy people. *Stroke* 2006;37(2):466-70.

STROBE 2007 (v4) Statement—Checklist of items that should be included in reports of *cohort studies*

| Section/Topic                | Item # | Recommendation                                                                                                                                                                       | Reported on page # |
|------------------------------|--------|--------------------------------------------------------------------------------------------------------------------------------------------------------------------------------------|--------------------|
| Title and abstract           | 1      | (a) Indicate the study's design with a commonly used term in the title or the abstract                                                                                               | Page3              |
|                              |        | (b) Provide in the abstract an informative and balanced summary of what was done and what was found                                                                                  | Page3              |
| <b>Introduction</b>          |        |                                                                                                                                                                                      |                    |
| Background/rationale         | 2      | Explain the scientific background and rationale for the investigation being reported                                                                                                 | Page4              |
| Objectives                   | 3      | State specific objectives, including any prespecified hypotheses                                                                                                                     | Page4              |
| <b>Methods</b>               |        |                                                                                                                                                                                      |                    |
| Study design                 | 4      | Present key elements of study design early in the paper                                                                                                                              | Page5              |
| Setting                      | 5      | Describe the setting, locations, and relevant dates, including periods of recruitment, exposure, follow-up, and data collection                                                      | Page5              |
| Participants                 | 6      | (a) Give the eligibility criteria, and the sources and methods of selection of participants. Describe methods of follow-up                                                           | Page5              |
|                              |        | (b) For matched studies, give matching criteria and number of exposed and unexposed                                                                                                  | Page5              |
| Variables                    | 7      | Clearly define all outcomes, exposures, predictors, potential confounders, and effect modifiers. Give diagnostic criteria, if applicable                                             | Page5-7            |
| Data sources/<br>measurement | 8*     | For each variable of interest, give sources of data and details of methods of assessment (measurement). Describe comparability of assessment methods if there is more than one group | Page6              |
| Bias                         | 9      | Describe any efforts to address potential sources of bias                                                                                                                            | NA                 |
| Study size                   | 10     | Explain how the study size was arrived at                                                                                                                                            | NA                 |
| Quantitative variables       | 11     | Explain how quantitative variables were handled in the analyses. If applicable, describe which groupings were chosen and why                                                         | Page7-8            |
| Statistical methods          | 12     | (a) Describe all statistical methods, including those used to control for confounding                                                                                                | Page7-8            |
|                              |        | (b) Describe any methods used to examine subgroups and interactions                                                                                                                  | NA                 |
|                              |        | (c) Explain how missing data were addressed                                                                                                                                          | NA                 |
|                              |        | (d) If applicable, explain how loss to follow-up was addressed                                                                                                                       | NA                 |
|                              |        | (e) Describe any sensitivity analyses                                                                                                                                                | NA                 |
| <b>Results</b>               |        |                                                                                                                                                                                      |                    |

|                          |     |                                                                                                                                                                                                              |         |
|--------------------------|-----|--------------------------------------------------------------------------------------------------------------------------------------------------------------------------------------------------------------|---------|
| Participants             | 13* | (a) Report numbers of individuals at each stage of study—eg numbers potentially eligible, examined for eligibility, confirmed eligible, included in the study, completing follow-up, and analysed            | NA      |
|                          |     | (b) Give reasons for non-participation at each stage                                                                                                                                                         | NA      |
|                          |     | (c) Consider use of a flow diagram                                                                                                                                                                           | NA      |
| Descriptive data         | 14* | (a) Give characteristics of study participants (eg demographic, clinical, social) and information on exposures and potential confounders                                                                     | Page4   |
|                          |     | (b) Indicate number of participants with missing data for each variable of interest                                                                                                                          | NA      |
|                          |     | (c) Summarise follow-up time (eg, average and total amount)                                                                                                                                                  | NA      |
| Outcome data             | 15* | Report numbers of outcome events or summary measures over time                                                                                                                                               | NA      |
| Main results             | 16  | (a) Give unadjusted estimates and, if applicable, confounder-adjusted estimates and their precision (eg, 95% confidence interval). Make clear which confounders were adjusted for and why they were included | Page8-9 |
|                          |     | (b) Report category boundaries when continuous variables were categorized                                                                                                                                    | Page8-9 |
|                          |     | (c) If relevant, consider translating estimates of relative risk into absolute risk for a meaningful time period                                                                                             | Page8-9 |
| Other analyses           | 17  | Report other analyses done—eg analyses of subgroups and interactions, and sensitivity analyses                                                                                                               | Page8-9 |
| <b>Discussion</b>        |     |                                                                                                                                                                                                              |         |
| Key results              | 18  | Summarise key results with reference to study objectives                                                                                                                                                     | Page8-9 |
| <b>Limitations</b>       |     |                                                                                                                                                                                                              |         |
| Interpretation           | 20  | Give a cautious overall interpretation of results considering objectives, limitations, multiplicity of analyses, results from similar studies, and other relevant evidence                                   | Page11  |
| Generalisability         | 21  | Discuss the generalisability (external validity) of the study results                                                                                                                                        | Page11  |
| <b>Other information</b> |     |                                                                                                                                                                                                              |         |
| Funding                  | 22  | Give the source of funding and the role of the funders for the present study and, if applicable, for the original study on which the present article is based                                                | NA      |

\*Give information separately for cases and controls in case-control studies and, if applicable, for exposed and unexposed groups in cohort and cross-sectional studies.

**Note:** An Explanation and Elaboration article discusses each checklist item and gives methodological background and published examples of transparent reporting. The STROBE checklist is best used in conjunction with this article (freely available on the Web sites of PLoS Medicine at <http://www.plosmedicine.org/>, Annals of Internal Medicine at <http://www.annals.org/>, and Epidemiology at <http://www.epidem.com/>). Information on the STROBE Initiative is available at [www.strobe-statement.org](http://www.strobe-statement.org).

# BMJ Open

## Relative risk values of age, acrolein, IL-6, and CRP as markers of periventricular hyperintensities: a cross-sectional study

|                                 |                                                                                                                                                                                                                                                                                                                                                                                                                                                                                                                                                                                                                                                                                                                                                            |
|---------------------------------|------------------------------------------------------------------------------------------------------------------------------------------------------------------------------------------------------------------------------------------------------------------------------------------------------------------------------------------------------------------------------------------------------------------------------------------------------------------------------------------------------------------------------------------------------------------------------------------------------------------------------------------------------------------------------------------------------------------------------------------------------------|
| Journal:                        | <i>BMJ Open</i>                                                                                                                                                                                                                                                                                                                                                                                                                                                                                                                                                                                                                                                                                                                                            |
| Manuscript ID:                  | bmjopen-2014-005598.R1                                                                                                                                                                                                                                                                                                                                                                                                                                                                                                                                                                                                                                                                                                                                     |
| Article Type:                   | Research                                                                                                                                                                                                                                                                                                                                                                                                                                                                                                                                                                                                                                                                                                                                                   |
| Date Submitted by the Author:   | 04-Jul-2014                                                                                                                                                                                                                                                                                                                                                                                                                                                                                                                                                                                                                                                                                                                                                |
| Complete List of Authors:       | Abe, Arata; Nippon Medical School, epartment of Neurological Science, Graduate School of Medicine<br>Nishiyama, Y; Nippon Medical School, epartment of Neurological Science, Graduate School of Medicine<br>Abe-Harada, Mina; Nippon Medical School, epartment of Neurological Science, Graduate School of Medicine<br>Okubo, Seiji; Nippon Medical School, epartment of Neurological Science, Graduate School of Medicine<br>Ueda, Masayuki; Nippon Medical School, epartment of Neurological Science, Graduate School of Medicine<br>Mishina, Masahiro; Graduate School of Medicine, Nippon Medical School, Department of Neurological Science<br>Katayama, Yasuo; Nippon Medical School, epartment of Neurological Science, Graduate School of Medicine |
| <b>Primary Subject Heading</b>: | Diagnostics                                                                                                                                                                                                                                                                                                                                                                                                                                                                                                                                                                                                                                                                                                                                                |
| Secondary Subject Heading:      | Neurology, Diagnostics                                                                                                                                                                                                                                                                                                                                                                                                                                                                                                                                                                                                                                                                                                                                     |
| Keywords:                       | Stroke < NEUROLOGY, Neurology < INTERNAL MEDICINE, Stroke medicine < INTERNAL MEDICINE                                                                                                                                                                                                                                                                                                                                                                                                                                                                                                                                                                                                                                                                     |
|                                 |                                                                                                                                                                                                                                                                                                                                                                                                                                                                                                                                                                                                                                                                                                                                                            |

SCHOLARONE™  
Manuscripts

1  
2  
3  
4 1 **Relative risk values of age, acrolein, IL-6, and CRP as markers of periventricular**  
5  
6  
7 2 **hyperintensities: a cross-sectional study**  
8  
9  
10 3

11  
12 4 Arata Abe\*, Yasuhiro Nishiyama, Mina Harada-Abe, Seiji Okubo, Masayuki Ueda, Masahiro  
13  
14  
15 5 Mishina, Yasuo Katayama  
16  
17  
18 6

19  
20  
21 7 Department of Neurological Science, Graduate School of Medicine, Nippon Medical School, 1-1-5  
22  
23  
24 8 Sendagi, Bunkyo-ku, Tokyo 113-8603, Japan  
25  
26  
27 9

28  
29  
30 10 **Keywords:** Protein-conjugated acrolein, IL-6, CRP, Periventricular hyperintensity, White matter  
31  
32  
33 11 intensities, stroke  
34  
35  
36 12

37  
38  
39 13 **\*Corresponding Author:**

40  
41 14 Arata Abe

42  
43  
44 15 Department of Neurological Science, Graduate School of Medicine, Nippon Medical School

45  
46  
47 16 1-1-5 Sendagi, Bunkyo-ku, Tokyo 113-8603, Japan

48  
49  
50 17 Tel: +81-3-3822-2131

51  
52  
53 18 Fax: +81-3-3822-4865

54  
55  
56 19 Email: [abe@nms.ac.jp](mailto:abe@nms.ac.jp)  
57  
58  
59  
60



1  
2  
3  
4 205  
6  
7 21 **Abstract**

8  
9  
10 22 Objective: Brain white matter hyperintensities (WMHs) can be divided into periventricular  
11  
12 23 hyperintensity (PVH) and deep-and-subcortical white matter hyperintensity (DSWMH), and the  
13  
14  
15 24 former contribute more to cognitive dysfunction and infarction risk. We conducted the present  
16  
17  
18 25 investigation to define the relationship between PVH and DSWMH.

19  
20  
21 26 Design: Cross-sectional study.

22  
23  
24 27 Setting: University hospital

25  
26  
27 28 Participants: We prospectively enrolled 228 healthy Japanese volunteer subjects with relative risk  
28  
29  
30 29 values (RRVs) > 0.5.

31  
32  
33 30 Primary outcome measures: We investigated whether it is possible to use the RRV to predict PVH  
34  
35  
36 31 and DSWMH.

37  
38  
39 32 Results: Among 228 subjects, 103 (45.1%) and 157 (68.8%) exhibited PVH and DSWMH,  
40  
41  
42 33 respectively. Age, body mass index (BMI), and PVH were significant independent determinants of  
43  
44  
45 34 RRV. A significant odds ratio (OR) for PVH was noted in the highest RRV tertile compared with the  
46  
47  
48 35 lowest one after adjusting for potential confounding factors. A significant OR for high predicted  
49  
50  
51 36 PVH risk was also found for RRV level as well.

52  
53  
54 37 Conclusion: Elevated RRV levels were significantly associated with increased predicted PVH,  
55  
56  
57 38 suggesting that measuring the plasma PCAcro, IL-6, and CRP levels may be useful for identifying

1  
2  
3  
4 39 Japanese at high risk for PVH.  
5  
6

7 40 **Strengths and limitations of this study:**  
8

9  
10 41 Using the RRV at clinical level, we investigate to evaluate WMHs.  
11

12 42 We provided the first evidence that RRV is associate with PVH rather than DSWMH.  
13

14  
15 43 These data are obtained from cases of cautious health care in Asian people and may not be applicable  
16

17  
18 44 to populations of poor health.  
19  
20

21 45  
22

23  
24 46  
25

26  
27 47  
28

29  
30 48  
31

32  
33 49  
34

35  
36 50  
37

38  
39 51  
40

41 52  
42

43  
44 53  
45

46  
47 54  
48

49  
50 55  
51

52  
53 56  
54

55  
56 57  
57

58

## 59 1. Introduction

60 A number of large-scale clinical studies have demonstrated that white matter hyperintensities  
61 (WMHs) are associated with high stroke risk<sup>1-3</sup>. The results of the large-scale, multicenter open trial  
62 PICA study<sup>4</sup> conducted in Japan suggest that the Fazekas-classified periventricular hyperintensities  
63 (PVHs) and deep-and-subcortical white matter hyperintensities (DSWMHs)<sup>5</sup> are related to the risk of  
64 symptomatic brain infarction (SBI). In the Rotterdam Scan study on elderly subjects with no history  
65 of stroke, conducted by magnetic resonance imaging (MRI) for 4.2 years, the proportional hazard  
66 ratio of stroke occurrence after adjustment of comorbid factors was 4.7 (95% confidence interval  
67 [CI], 2.0–11.2) in PVH and 3.6 (CI, 1.4–9.2) in DSWMH<sup>6</sup>. Unlike DSWMH, PVH is associated with  
68 cognitive dysfunction<sup>7</sup>. In other studies, associations were separately assessed for PVH and DSWMH  
69 and was significant only for PVH, which was related to decreased processing speed and executive  
70 function<sup>8,9</sup>. Additionally, PVH predicted poorer functional outcome after stroke both in the acute  
71 and chronic phases, independently of DSWMH<sup>10,11</sup>. A Chiba University group reported that the  
72 relative risk value (RRV) measured based on protein-conjugated acrolein (PC-Acro) together with  
73 interleukin-6 (IL-6) and C-reactive protein (CRP) can be used to predict the stroke risk factors of  
74 silent brain infarction (SBI), carotid atherosclerosis (CA), and WMH with high sensitivity and  
75 specificity<sup>12</sup>. We measured plasma PCAcro, IL-6 and CRP, analyzed the measurements in  
76 conjunction with age to determine whether it is possible to use the RRV to predict PVH and

1  
2  
3  
4 77 DSWMH.  
5  
6

7 78 2. Materials and methods  
8  
9

10 79 2.1. Subjects and blood sampling  
11

12 80 We examined 228 adult volunteers (78 women and 150 men, age  $65.0 \pm 7.0$  years, range 31–83  
13  
14  
15 81 years). All these subjects were healthy volunteers living independently at home without apparent  
16  
17  
18 82 history of stroke, cardiovascular disease, or malignancy. Subjects with RRV  $> 0.5$  were enrolled  
19  
20  
21 83 prospectively. Informed consent was provided by each subject, and our study protocol was approved  
22  
23  
24 84 by the Ethics Committees of Nippon Medical School Hospital. Experiments were carried out in  
25  
26  
27 85 accordance with the Declaration of Helsinki principles. Blood samples were collected into tubes  
28  
29  
30 86 containing 3 U/mL heparin and centrifuged at  $1500 \times g$  for 10 min at  $4^{\circ}\text{C}$ .  
31  
32

33 87  
34  
35

36 88 2.2. PC-Acro, IL-6, and CRP Measurements  
37

38 89 Blood samples were drawn from the antecubital vein after overnight fasting. PC-Acro  
39  
40  
41 90 [*N*-(3-formyl-3,4-dehydropiperidino)-lysine (FDPLysine) in protein] was determined as previously  
42  
43  
44 91 described<sup>13</sup> using an ACR-LYSINE ADDUCT ELISA SYSTEM (NOF Corporation, Tokyo, Japan)  
45  
46  
47 92 and 0.01 mL plasma. IL-6 and CRP were quantified using an Endogen Human IL-6 ELISA kit  
48  
49  
50 93 (Pierce Biotechnology, Inc., Rockford, IL, USA) and a human CRP ELISA kit (Alpha Diagnostic  
51  
52  
53 94 International, San Antonio, TX, USA), respectively, according to the manufacturers' protocols. After  
54  
55  
56 95 the reaction was terminated, absorbance was measured at 450 nm using a microplate reader  
57  
58  
59  
60

1  
2  
3  
4 96 (MTP-800APC, Hitachi, Tokyo, Japan). The biochemical markers from each subject were measured  
5  
6  
7 97 by an investigator who was blinded to the MRI results (Amine Pharma Research Institute, Chiba,  
8  
9  
10 98 Japan). Relative risk value (RRV) was calculated with artificial neural networks by back propagation  
11  
12 99 method using NEUROSIM/L software version 4 (Fujitsu, Tokyo, Japan)<sup>14</sup>. Using the report by a  
13  
14  
15 100 Chiba University group, we worked out predictive RRV in the range of 0–1<sup>12 15</sup>, with the nil as the  
16  
17  
18 101 lowest value as an index of the degree of tissue damage. Values > 0.5 were considered to indicate  
19  
20  
21 102 WMH risk.  
22  
23  
24 103

25  
26 104 Standard enzymatic methods were used to measure the levels of serum total cholesterol,  
27  
28  
29 105 triglycerides, creatinine, and plasma glucose. Serum high-density lipoprotein (HDL) cholesterol level  
30  
31  
32 106 was measured with a direct method, and serum low-density lipoprotein (LDL) cholesterol level was  
33  
34  
35 107 calculated using Friedewald's formula in the 228 subjects with serum triglyceride levels < 400  
36  
37 108 mg/dL<sup>16</sup>. Diabetes was defined as a fasting plasma glucose level  $\geq 126$  mg/dL or the use of  
38  
39  
40 109 glucose-lowering medications. Dyslipidemia was defined as total cholesterol level  $\geq 220$  mg/dL,  
41  
42  
43 110 HDL cholesterol level < 40 mg/dL and a triglyceride level  $\geq 150$  mg/dL, as well as the use of  
44  
45  
46 111 lipid-lowering medications. The estimated glomerular filtration rate (eGFR) was calculated for  
47  
48  
49 112 Japanese men as recommended by the Japanese Society of Nephrology<sup>17</sup> and represented as: eGFR  
50  
51 113  $(\text{mL}/\text{min}/1.73 \text{ m}^2) = 193 \times \text{serum creatinine}^{-1.094} \times \text{age}^{-0.287}$ .  
52  
53  
54

55 114 2.3. Imaging  
56  
57  
58  
59  
60

1  
2  
3  
4 115 All 228 subjects underwent T1- and T2-weighted MRI and fluid-attenuated inversion recovery  
5  
6  
7 116 (FLAIR) at the Nippon Medical School Hospital, Japan, within 1 month after blood sampling. MRI  
8  
9  
10 117 was performed as described previously<sup>10</sup>. PVH and DSWMH were defined as hyperintense areas on  
11  
12  
13 118 T2 and FLAIR images without any abnormality on T1<sup>18</sup> in subjects without neurological signs and/or  
14  
15  
16 119 symptoms. The 228 subjects were classified into 103 PVH subjects (38 women and 65 men, aged  
17  
18  
19 120  $68.2 \pm 6.0$  years, RRV  $0.75 \pm 0.11$ ) and 157 WMH subjects (61 women and 96 men, aged  $66.7 \pm 5.8$   
20  
21  
22 121 years, RRV  $0.71 \pm 0.12$ ). In more detail, 76 among all the subjects had both PVH and DSWMH, the  
23  
24  
25 122 other 23 having silent brain infarction. Also, 22 subjects had a complication of PVH and silent brain  
26  
27  
28 123 infarction, while in 20 subjects there was complication of DSWMH and silent brain infarction.  
29  
30  
31 124

#### 32 33 125 2.4. Statistics

34  
35  
36 126 All statistical tests were performed using the JMP9.02 software program (SAS Institute, Cary, NC,  
37  
38  
39 127 USA). Continuous variables except for triglyceride levels were expressed as means  $\pm$  standard  
40  
41  
42 128 deviation (SD). Triglyceride levels were transformed to the common logarithm for statistical analysis  
43  
44  
45 129 and are expressed as the geometric mean because of their skewed distribution. Categorical data are  
46  
47  
48 130 expressed as the number of subjects (percent of total). The clinical characteristics for each RRV  
49  
50  
51 131 tertile were compared by analysis of variance (ANOVA) for continuous variables and  $\chi^2$  test for  
52  
53  
54 132 categorical variables. The RRVs between the two groups were compared by Student's t-tests or by  
55  
56  
57 133 ANOVA followed by multiple comparisons with the Bonferroni correction between the two groups.  
58  
59  
60

1  
2  
3  
4 134 Correlations between RRV and other variables were evaluated with the Pearson's moment correlation  
5  
6  
7 135 coefficient. Factors with a P value < 0.05 as determined by Pearson's correlation analysis were  
8  
9  
10 136 included in a multiple linear regression analysis to identify independent determinants of the RRV.  
11  
12  
13 137 Logistic regression analysis was performed to obtain the odds ratios (ORs) for PVH and DSWMH in  
14  
15  
16 138 the three tertiles. All statistical tests were two-sided, and a P value < 0.05 was considered as  
17  
18  
19 139 significant.

20  
21 140

### 22 23 24 141 3. Results

25  
26  
27 142 The study subjects were divided into tertiles according to RRV (0.50–0.62, 0.63–0.79, and 0.80–0.90  
28  
29  
30 143 from the lowest to highest tertile, respectively). The subjects' clinical characteristics are summarized  
31  
32  
33 144 in Table 1. The mean RRV of the entire subject population was  $0.71 \pm 0.13$ , and the mean age was 65  
34  
35  
36 145  $\pm 7$  years. Age, body mass index (BMI), diastolic blood pressure (BP), HDL cholesterol level,  
37  
38  
39 146 triglyceride level, eGFR, and current smoking status were significantly different among the groups.

40  
41  
42 147 RRVs were significantly higher in subjects with older age, lower eGFR, or PVH (Table 1). A simple  
43  
44  
45 148 correlation analysis showed that RRV was significantly correlated with age, systolic BP, eGFR, and  
46  
47  
48 149 PVH (Table 2). Multiple linear regression analysis indicated that BMI ( $\beta = 0.0026$ ,  $P = 0.044$ ) and  
49  
50  
51 150 PVH ( $\beta = 0.0380$ ,  $P < 0.0001$ ) were significant independent determinants of RRV.

52  
53  
54 151 The results of logistic regression analysis of the association between PVH and RRV are shown in  
55  
56  
57 152 Table 3. Significant, unadjusted ORs for PVH were noted in the third RRV tertile (5.26 [95% CI,

1  
2  
3  
4 153 2.66–10.78],  $P < 0.0001$ ), compared to the first tertile. After adjusting for model 1 (BMI, systolic BP,  
5  
6  
7 154 triglycerides, eGFR, and current smoking status) the ORs in the third RRV tertile remained  
8  
9  
10 155 significant (4.75 [95% CI, 2.33–10.05],  $P < 0.0001$ ). After adjusting for model 2, we found that the  
11  
12  
13 156 OR in the third RRV tertile 3 was significant (5.26 [95% CI, 2.65–10.83],  $P < 0.0001$ ). A significant  
14  
15  
16 157 relationship was observed between RRV and PVH ( $P < 0.05$ ) but no such significance was found  
17  
18  
19 158 between RRV and DSWMH (figure 1).

20  
21 159

#### 22 23 24 160 4. Discussion

25  
26  
27 161 The present study demonstrated a significant, positive correlation between RRV and PVH in healthy  
28  
29  
30 162 Japanese volunteers. Notably, the highest RRV level tertile showed a significantly higher OR for a  
31  
32  
33 163 high predicted PVH risk in comparison to the lowest tertile, even after adjusting for multiple  
34  
35  
36 164 confounding factors. These results suggest that RRV is associated with the estimated risk of PVH in  
37  
38  
39 165 healthy Japanese volunteers. A number of clinical and epidemiological studies have examined the  
40  
41  
42 166 predictive value of RRV for the presence of WMH<sup>12 15</sup>. However, those studies assessed WMH  
43  
44  
45 167 prevalence; no studies have shown any significant association of RRV with PVH and DSWMH  
46  
47  
48 168 separately. In this regard, our results raise the possibility that RRV predicts the risk of PVH in the  
49  
50  
51 169 healthy Japanese population. With respect to age, these biochemical markers provide a good index of  
52  
53  
54 170 the presence of tissue damage related to PVH.

55  
56 171 More recent studies focused on WMH location have reported that functional impairment within 1–3  
57  
58  
59  
60



1  
2  
3  
4 172 months after stroke correlated with PVH but not with DSWMH<sup>10 19</sup>. PVH WMH, especially PVH,  
5  
6  
7 173 has impacts on early functional recovery after ischemic stroke regardless of the initial stroke severity  
8  
9  
10 174 and other cardiovascular risk factors<sup>11</sup>. Other groups found a significant association between PVH  
11  
12  
13 175 and decreases in processing speed and executive function, but there was no such relationship with  
14  
15  
16 176 DSWMH<sup>8 9</sup>. Why PVH and DSWMH have different relationships with stroke outcome remains  
17  
18  
19 177 unclear, but several theories have been put forward. DSWMH predominantly disrupt short  
20  
21  
22 178 association fibers that link adjacent gyri, while PVH affects long association fibers that connect the  
23  
24  
25 179 more distant cortical areas<sup>20</sup>. Thus, lesions in various white matter locations may disconnect from  
26  
27  
28 180 different neural networks that affect neural repair processes after stroke<sup>21</sup>. In addition, PVHs are  
29  
30  
31 181 related to diminished cerebral vasomotor reactivity and subsequent occurrence of cerebral  
32  
33  
34 182 hypoperfusion<sup>22</sup>, while DSWMHs are generally associated with microangiopathy<sup>23</sup>. It is clear that  
35  
36  
37 183 regional hypoperfusion is a good predictor of functional outcome<sup>24</sup>. These findings shed light on  
38  
39  
40 184 why PVH can predict functional stroke outcome and specific cognitive functions<sup>11</sup>.  
41  
42  
43 185 Acrolein induces IL-6 production in astrocytes, macrophages, and endothelial cells, while IL-6  
44  
45  
46 186 induces CRP production in hepatocytes. Then, CRP stimulates IL-6 production, and IL-6 decreases  
47  
48  
49 187 acrolein toxicity<sup>25</sup>. Acrolein was thought to be one of the toxic compounds produced from  
50  
51  
52 188 unsaturated fatty acids by active oxygen species such as superoxide anion radical, hydrogen peroxide,  
53  
54  
55 189 and hydroxyl radical<sup>13</sup>. These findings may partially explain the pathophysiological mechanisms  
56  
57  
58 190 underlying the association between PVH and the three biomarkers assessed in the present study.  
59  
60

1  
2  
3  
4 191 Further investigation will be needed for a better understanding of their interrelationship.  
5  
6

7 192  
8  
9

10 193 Our multiple linear regression analysis showed that RRV was independently associated with BMI  
11  
12 194 and PVH. Although obesity is believed to be an independent cardiovascular risk factor <sup>26</sup>, it is still  
13  
14 195 controversial whether BMI is a significant risk factor for stroke <sup>27 28</sup>. BMI was previously reported to  
15  
16 196 be correlated with high RRV <sup>29</sup> which may be caused by vascular degeneration and endothelial  
17  
18 197 dysfunction associated with hypertension and metabolic disorders. Subjects with metabolic  
19  
20 198 syndrome are generally defined as those who have abdominal obesity and two additional metabolic  
21  
22 199 disorders including hypertension, dyslipidemia, and hyperglycemia <sup>30 31</sup>.  
23  
24  
25  
26  
27  
28  
29

30 200  
31  
32

33 201 Our study has some potential limitations. Because it was a cross-sectional investigation, we could not  
34  
35 202 determine a causal relationship between increased RRV and PVH risk. In addition, the population  
36  
37 203 included healthy Japanese volunteers only. Therefore, it is unclear whether the results can be  
38  
39 204 extrapolated to other populations of poor health, patients with cardiovascular diseases, or other  
40  
41 205 ethnic groups. Despite these potential limitations, our findings support the conclusion that elevated  
42  
43 206 RRV is significantly associated with PVH in healthy Japanese volunteers. These results suggest that  
44  
45 207 RRV measurement may be useful for identifying PVH in the general population. This would allow  
46  
47 208 clinicians to follow patients who may be at risk for stroke and cognitive dysfunction.  
48  
49  
50  
51  
52  
53  
54  
55

56 209  
57  
58  
59  
60

1  
2  
3  
4 210 **Acknowledgments**  
5

6  
7 211 We thank Drs. Mari Adachi and Sadaji Kura at Katsushika Health Center for assisting with the data  
8  
9  
10 212 analyses.

11  
12 213 **Contributorship**  
13

14 214  
15 215 Conception and design: AA  
16 216 Analysis and interpretation: YN, MHA, SO, MU  
17 217 Writing the article: AA  
18 218 Critical revision of the article: YN, MM, YK  
19 219 Final approval of the article: YN, MHA, SO, MU, MM, YK  
20 220 Statistical analysis: YN, MM  
21 221 Overall responsibility: AA  
22 222

23  
24 223 **Competing Interests**  
25

26 224  
27 225 None  
28

29 226  
30 227 **Data Sharing Statement**  
31

32 228  
33 229 No additional data available  
34

35 230  
36 231  
37 232  
38 233  
39 234  
40 235  
41 236  
42 237  
43 238  
44 239  
45 240  
46 241  
47 242  
48 243  
49 244  
50  
51  
52  
53  
54  
55  
56  
57  
58  
59  
60

245 **References**

246

- 247 1. Wong TY, Klein R, Sharrett AR, et al. Cerebral white matter lesions, retinopathy, and incident  
248 clinical stroke. *Jama* 2002;288(1):67-74.
- 249 2. Gouw AA, van der Flier WM, Fazekas F, et al. Progression of white matter hyperintensities and  
250 incidence of new lacunes over a 3-year period: the Leukoaraiosis and Disability study. *Stroke*  
251 2008;39(5):1414-20.
- 252 3. Bokura H, Yamaguchi S, Kobayashi S. Electrophysiological correlates for response inhibition in a  
253 Go/NoGo task. *Clin Neurophysiol* 2001;112(12):2224-32.
- 254 4. Shinohara Y, Tohgi H, Hirai S, et al. Effect of the Ca antagonist nilvadipine on stroke occurrence  
255 or recurrence and extension of asymptomatic cerebral infarction in hypertensive patients with  
256 or without history of stroke (PICA Study). 1. Design and results at enrollment. *Cerebrovasc*  
257 *Dis* 2007;24(2-3):202-9.
- 258 5. Schmidt R, Fazekas F, Kapeller P, et al. MRI white matter hyperintensities: three-year follow-up  
259 of the Austrian Stroke Prevention Study. *Neurology* 1999;53(1):132-9.
- 260 6. Vermeer SE, Hollander M, van Dijk EJ, et al. Silent brain infarcts and white matter lesions  
261 increase stroke risk in the general population: the Rotterdam Scan Study. *Stroke*  
262 2003;34(5):1126-9.
- 263 7. Fukuda H, Kobayashi S, Okada K, et al. Frontal white matter lesions and dementia in lacunar  
264 infarction. *Stroke* 1990;21(8):1143-9.
- 265 8. van den Heuvel DM, ten Dam VH, et al. Increase in periventricular white matter hyperintensities  
266 parallels decline in mental processing speed in a non-demented elderly population. *J Neurol*  
267 *Neurosurg Psychiatry* 2006;77(2):149-53.
- 268 9. Debette S, Bombois S, Bruandet A, et al. Subcortical hyperintensities are associated with cognitive  
269 decline in patients with mild cognitive impairment. *Stroke* 2007;38(11):2924-30.
- 270 10. Kissela B, Lindsell CJ, Kleindorfer D, et al. Clinical prediction of functional outcome after  
271 ischemic stroke: the surprising importance of periventricular white matter disease and race.  
272 *Stroke* 2009;40(2):530-6.
- 273 11. Liou LM, Chen CF, Guo YC, et al. Cerebral white matter hyperintensities predict functional  
274 stroke outcome. *Cerebrovasc Dis* 2010;29(1):22-7.
- 275 12. Yoshida M, Tomitori H, Machi Y, et al. Acrolein, IL-6 and CRP as markers of silent brain  
276 infarction. *Atherosclerosis* 2009;203(2):557-62.
- 277 13. Uchida K, Kanematsu M, Morimitsu Y, et al. Acrolein is a product of lipid peroxidation reaction.  
278 Formation of free acrolein and its conjugate with lysine residues in oxidized low density  
279 lipoproteins. *J Biol Chem* 1998;273(26):16058-66.
- 280 14. Ellenius J, Groth T, Lindahl B, et al. Early assessment of patients with suspected acute  
281 myocardial infarction by biochemical monitoring and neural network analysis. *Clin Chem*  
282 1997;43(10):1919-25.

- 1  
2  
3 283 15. Yoshida M, Higashi K, Kobayashi E, et al. Correlation between images of silent brain infarction,  
4 284 carotid atherosclerosis and white matter hyperintensity, and plasma levels of acrolein, IL-6  
5 285 and CRP. *Atherosclerosis* 2010;211(2):475-9.  
6  
7 286 16. Friedewald WT, Levy RI, Fredrickson DS. Estimation of the concentration of low-density  
8 287 lipoprotein cholesterol in plasma, without use of the preparative ultracentrifuge. *Clin Chem*  
9 288 1972;18(6):499-502.  
10  
11 289 17. Matsuo S, Imai E, Horio M, et al. Revised equations for estimated GFR from serum creatinine in  
12 290 Japan. *Am J Kidney Dis* 2009;53(6):982-92.  
13  
14 291 18. Fazekas F, Kleinert R, Offenbacher H, et al. The morphologic correlate of incidental punctate  
15 292 white matter hyperintensities on MR images. *AJNR Am J Neuroradiol* 1991;12(5):915-21.  
16  
17 293 19. Kang HJ, Stewart R, Park MS, et al. White matter hyperintensities and functional outcomes at 2  
18 294 weeks and 1 year after stroke. *Cerebrovasc Dis* 2013;35(2):138-45.  
19  
20 295 20. Brodal P. *The central nervous system : structure and function*. 3rd ed. Oxford: Oxford University  
21 296 Press, 2004.  
22  
23 297 21. Chollet F, DiPiero V, Wise RJ, et al. The functional anatomy of motor recovery after stroke in  
24 298 humans: a study with positron emission tomography. *Ann Neurol* 1991;29(1):63-71.  
25  
26 299 22. Gerdes VE, Kwa VI, ten Cate H, et al. Cerebral white matter lesions predict both ischemic  
27 300 strokes and myocardial infarctions in patients with established atherosclerotic disease.  
28 301 *Atherosclerosis* 2006;186(1):166-72.  
29  
30 302 23. Fazekas F, Kleinert R, Offenbacher H, et al. Pathologic correlates of incidental MRI white matter  
31 303 signal hyperintensities. *Neurology* 1993;43(9):1683-9.  
32  
33 304 24. Giubilei F, Lenzi GL, Di Piero V, et al. Predictive value of brain perfusion single-photon emission  
34 305 computed tomography in acute ischemic stroke. *Stroke* 1990;21(6):895-900.  
35  
36 306 25. Saiki R, Hayashi D, Ikuo Y, et al. Acrolein stimulates the synthesis of IL-6 and C-reactive protein  
37 307 (CRP) in thrombosis model mice and cultured cells. *J Neurochem* 2013.  
38  
39 308 26. Poirier P, Giles TD, Bray GA, et al. Obesity and cardiovascular disease: pathophysiology,  
40 309 evaluation, and effect of weight loss: an update of the 1997 American Heart Association  
41 310 Scientific Statement on Obesity and Heart Disease from the Obesity Committee of the  
42 311 Council on Nutrition, Physical Activity, and Metabolism. *Circulation* 2006;113(6):898-918.  
43  
44 312 27. Haapaniemi H, Hillbom M, Juvela S. Lifestyle-associated risk factors for acute brain infarction  
45 313 among persons of working age. *Stroke* 1997;28(1):26-30.  
46  
47 314 28. Rexrode KM, Hennekens CH, Willett WC, et al. A prospective study of body mass index, weight  
48 315 change, and risk of stroke in women. *Jama* 1997;277(19):1539-45.  
49  
50 316 29. Yoshida M, Mizoi M, Saiki R, et al. Relationship between metabolic disorders and relative risk  
51 317 values of brain infarction estimated by protein-conjugated acrolein, IL-6 and CRP together  
52 318 with age. *Clin Chim Acta* 2011;412(3-4):339-42.  
53  
54 319 30. Ninomiya JK, L'Italien G, Criqui MH, et al. Association of the metabolic syndrome with history  
55 320 of myocardial infarction and stroke in the Third National Health and Nutrition Examination  
56  
57  
58  
59  
60

1  
2  
3  
4  
5  
6  
7  
8  
9  
10  
11  
12  
13  
14  
15  
16  
17  
18  
19  
20  
21  
22  
23  
24  
25  
26  
27  
28  
29  
30  
31  
32  
33  
34  
35  
36  
37  
38  
39  
40  
41  
42  
43  
44  
45  
46  
47  
48  
49  
50  
51  
52  
53  
54  
55  
56  
57  
58  
59  
60

321 Survey. *Circulation* 2004;109(1):42-6.  
322 31. Kwon HM, Kim BJ, Lee SH, et al. Metabolic syndrome as an independent risk factor of silent  
323 brain infarction in healthy people. *Stroke* 2006;37(2):466-70.  
324  
325

For peer review only

Table 1. Characteristics of the study subjects due to their stroke risk marker level tertile

| Item                                        | All            | Silent brain infarction RRV tertile |                |               | P value* |
|---------------------------------------------|----------------|-------------------------------------|----------------|---------------|----------|
|                                             |                | Tertile 1                           | Tertile 2      | Tertile 3     |          |
| Subjects (n)                                | 228            | 76                                  | 73             | 79            | -        |
| Silent brain infarction relative risk value | 0.71 ± 0.13    | 0.51 ± 0.07**                       | 0.69 ± 0.05**  | 0.86 ± 0.03** | -        |
| Age (years)                                 | 65 ± 7         | 59 ± 7                              | 66 ± 3         | 70 ± 6        | <0.0001  |
| Male Sex                                    | 150 (65.7)     | 51 (67.1)                           | 52 (71.2)      | 47 (59.4)     | 0.299    |
| Body mass index, kg/m <sup>2</sup>          | 24.2 ± 6.4     | 23.2 ± 2.9                          | 24.6 ± 6.3     | 24.8 ± 8.6    | 0.133    |
| Systolic BP, mmHg                           | 123 ± 15       | 121 ± 14                            | 122 ± 14       | 126 ± 17      | 0.275    |
| Diastolic BP, mmHg                          | 75 ± 11        | 75 ± 9                              | 75 ± 10        | 75 ± 13       | 0.947    |
| Hypertension, n (%)                         | 81 (35.6)      | 23 (30.6)                           | 20 (27.4)      | 38 (48.1)     | 0.015    |
| Total cholesterol, mg/dL                    | 208 ± 32       | 208 ± 30                            | 208 ± 32       | 207 ± 34      | 0.903    |
| LDL cholesterol <sup>†</sup> , mg/dL        | 123 ± 29       | 123 ± 25                            | 123 ± 29       | 122 ± 33      | 0.848    |
| HDL cholesterol, mg/dL                      | 58 ± 15        | 59 ± 17                             | 57 ± 13        | 60 ± 16       | 0.385    |
| Triglycerides <sup>††</sup> , mg/dL         | 125 (113, 138) | 141 (111, 172)                      | 123 (105, 142) | 112 (99, 124) | 0.425    |

|                                    |             |             |             |             |         |
|------------------------------------|-------------|-------------|-------------|-------------|---------|
| Dyslipidemia, n (%)                | 55 (24.1)   | 19 (25.0)   | 13 (17.8)   | 23 (29.1)   | 0.259   |
| Fasting plasma glucose, mg/dL      | 100 ± 16    | 100 ± 14    | 99 ± 18     | 100 ± 15    | 0.754   |
| Diabetes, n (%)                    | 18 (7.8)    | 3 (3.9)     | 6 (8.2)     | 9 (11.3)    | 0.226   |
| eGFR (mL/min/1.73 m <sup>2</sup> ) | 67.6 ± 12.5 | 70.2 ± 15.3 | 67.3 ± 10.6 | 65.4 ± 10.6 | 0.027   |
| Current smoking status, n (%)      | 40 (17.5)   | 16 (21.0)   | 12 (16.4)   | 12 (15.1)   | 0.603   |
| PVH, n (%)                         | 103 (45.1)  | 18 (23.6)   | 36 (49.3)   | 49 (62.0)   | <0.0001 |
| DSWMH, n (%)                       | 157 (68.8)  | 52 (68.4)   | 50 (68.4)   | 55 (69.6)   | 0.983   |

\*Analysis of variance or chi-square test among the ADMA tertile. \*\*Range of a minimum-to-maximum stroke risk marker in each tertile. †n = 228. ††Geometric mean (95% confidence intervals). ‡Statistical analysis was not conducted because of the extremely small number of subjects in each category. BP, blood pressure; DSWMH, deep-and-subcortical white matter hyperintensity; eGFR, estimated glomerular filtration rate; HDL, high-density lipoprotein; LDL, low-density lipoprotein; PVH, periventricular hyperintensity; RRV, relative risk value



Table 2. Correlation coefficients and multiple linear regression analysis of relative risk value with the clinical parameters

| Item                             | Simple correlation analysis |         | Multiple linear regression analysis             |         |
|----------------------------------|-----------------------------|---------|-------------------------------------------------|---------|
|                                  | Correlation coefficient (r) | P-value | Standardized regression coefficient ( $\beta$ ) | P value |
| Age                              | 0.60                        | <0.0001 | †                                               |         |
| Male Sex                         | 0.05                        | 0.347   | ††                                              |         |
| BMI                              | 0.11                        | 0.075   | ††                                              |         |
| Systolic BP                      | 0.14                        | 0.026   | 0.0009                                          | 0.078   |
| Diastolic BP                     | 0.05                        | 0.382   | ††                                              |         |
| Total cholesterol                | -0.03                       | 0.618   | ††                                              |         |
| LDL cholesterol*                 | -0.02                       | 0.669   | ††                                              |         |
| HDL cholesterol                  | 0.02                        | 0.731   | ††                                              |         |
| Triglycerides**                  | -0.10                       | 0.130   | ††                                              |         |
| Fasting plasma glucose           | 0.01                        | 0.841   | ††                                              |         |
| eGFR                             | -0.13                       | 0.041   | -0.0009                                         | 0.173   |
| Current smoking status (Yes = 1) | -0.10                       | 0.115   | ††                                              |         |
| PVH (Yes = 1)                    | 0.26                        | <0.0001 | 0.0384                                          | <0.0001 |
| DSWMH (Yes = 1)                  | 0.02                        | 0.689   | ††                                              |         |

\* n = 228. \*\* Log-transformed value. † Not included in the multiple linear regression analysis to avoid multicollinearity with PVH relative risk value.

†† Not included in the multiple linear regression analysis because their P values were  $\geq 0.05$  in the simple correlation analysis. BMI, body mass index; BP, blood pressure; DSWMH, deep-and-subcortical white matter hyperintensity; eGFR, estimated glomerular filtration rate; HDL, high-density lipoprotein; LDL, low-density lipoprotein.

1  
2  
3  
4  
5  
6  
7  
8  
9  
10  
11  
12  
13  
14  
15  
16  
17  
18  
19  
20  
21  
22  
23  
24  
25  
26  
27  
28  
29  
30  
31  
32  
33  
34  
35  
36  
37  
38  
39  
40  
41  
42  
43  
44  
45  
46  
47  
48  
49

Table 3. Unadjusted and adjusted PVH ORs in each silent brain infarction relative risk value tertile

| Item      | Unadjusted |            |         | Adjusted* |            |         |
|-----------|------------|------------|---------|-----------|------------|---------|
|           | OR         | 95% CI     | P-value | OR        | 95% CI     | P value |
| Tertile 1 | 1.00       | reference  | -       | 1.00      | reference  | -       |
| Tertile 2 | 3.13       | 1.57–6.41  | 0.0014  | 3.01      | 1.50–6.20  | 0.0018  |
| Tertile 3 | 5.26       | 2.66–10.78 | <0.0001 | 4.87      | 2.43–10.08 | <0.0001 |

\* Adjusted for systolic BP and eGFR

BP, blood pressure; eGFR, estimated glomerular filtration rate; OR, odds ratio; PVH, periventricular hyperintensity

1  
2  
3  
4  
5  
6  
7  
8  
9  
10  
11  
12  
13  
14  
15  
16  
17  
18  
19  
20  
21  
22  
23  
24  
25  
26  
27  
28  
29  
30  
31  
32  
33  
34  
35  
36  
37  
38  
39  
40  
41  
42  
43  
44  
45  
46  
47  
48  
49

For peer review only

1  
2  
3  
4  
5  
6  
7  
8  
9  
10  
11  
12  
13  
14  
15  
16  
17  
18  
19  
20  
21  
22  
23  
24  
25  
26  
27  
28  
29  
30  
31  
32  
33  
34  
35  
36  
37  
38  
39  
40  
41  
42  
43  
44  
45  
46  
47  
48  
49  
50  
51  
52  
53  
54  
55  
56  
57  
58  
59  
60

Figure 1. Correlation between the RRV and the PVH (A). Correlation between the RRV and DSWMH (B)

\*Significant at  $P < 0.05$

For peer review only

1  
2  
3  
4 1 **Relative risk values of age, acrolein, IL-6, and CRP as markers of periventricular**  
5  
6  
7 2 **hyperintensities: a cross-sectional study**  
8  
9  
10 3

11  
12 4 Arata Abe\*, Yasuhiro Nishiyama, Mina Harada-Abe, Seiji Okubo, Masayuki Ueda, Masahiro  
13  
14  
15 5 Mishina, Yasuo Katayama  
16  
17  
18 6

19  
20  
21 7 Department of Neurological Science, Graduate School of Medicine, Nippon Medical School, 1-1-5  
22  
23  
24 8 Sendagi, Bunkyo-ku, Tokyo 113-8603, Japan  
25  
26  
27 9

28  
29  
30 10 **Keywords:** Protein-conjugated acrolein, IL-6, CRP, Periventricular hyperintensity, White matter  
31  
32  
33 11 intensities, stroke  
34  
35  
36 12

37  
38  
39 13 **\*Corresponding Author:**

40  
41 14 Arata Abe

42  
43  
44 15 Department of Neurological Science, Graduate School of Medicine, Nippon Medical School

45  
46  
47 16 1-1-5 Sendagi, Bunkyo-ku, Tokyo 113-8603, Japan

48  
49  
50 17 Tel: +81-3-3822-2131

51  
52  
53 18 Fax: +81-3-3822-4865

54  
55  
56 19 Email: [abe@nms.ac.jp](mailto:abe@nms.ac.jp)  
57  
58  
59  
60

1  
2  
3  
4 20  
5  
6 21  
7  
8  
9  
10  
11  
12  
13  
14  
15  
16  
17  
18  
19  
20  
21  
22  
23  
24  
25  
26  
27  
28  
29  
30  
31  
32  
33  
34  
35  
36  
37  
38  
39  
40  
41  
42  
43  
44  
45  
46  
47  
48  
49  
50  
51  
52  
53  
54  
55  
56  
57  
58  
59  
60

For peer review only

1  
2  
3  
4 **22 Abstract**

5  
6  
7 23 Objective: Brain white matter hyperintensities (WMHs) can be divided into periventricular  
8  
9  
10 24 hyperintensity (PVH) and deep-and-subcortical white matter hyperintensity (DSWMH), and the  
11  
12  
13 25 former contribute more to cognitive dysfunction and infarction risk. We conducted the present  
14  
15  
16 26 investigation to define the relationship between PVH and DSWMH.

17  
18  
19 27 Design: Cross-sectional study.

20  
21  
22 28 Setting: University hospital

23  
24  
25 29 Participants: We prospectively enrolled 228 healthy Japanese volunteer subjects with relative risk  
26  
27 30 values (RRVs) > 0.5.

28  
29  
30 31 Primary outcome measures: We investigated whether it is possible to use the RRV to predict PVH  
31  
32  
33 32 and DSWMH.

34  
35  
36 33 Results: Among 228 subjects, 103 (45.1%) and 157 (68.8%) exhibited PVH and DSWMH,  
37  
38  
39 34 respectively. Age, body mass index (BMI), and PVH were significant independent determinants of  
40  
41  
42 35 RRV. A significant odds ratio (OR) for PVH was noted in the highest RRV tertile compared with the  
43  
44  
45 36 lowest one after adjusting for potential confounding factors. A significant OR for high predicted  
46  
47  
48 37 PVH risk was also found for RRV level as well.

49  
50  
51 38 Conclusion: Elevated RRV levels were significantly associated with increased predicted PVH,  
52  
53  
54 39 suggesting that measuring the plasma PCAcro, IL-6, and CRP levels may be useful for identifying  
55  
56  
57 40 Japanese at high risk for PVH.

1  
2  
3  
4 41 Strengths and limitations of this study:

5  
6  
7 42 Using the RRV at clinical level, we investigate to evaluate WMHs.

8  
9  
10 43 We provided the first evidence that RRV is associate with PVH rather than DSWMH.

11  
12 44 These data are obtained from cases of cautious health care in Asian people and may not be applicable  
13  
14  
15  
16 45 to populations of poor health.

17  
18  
19  
20  
21 47 **Keywords:** Protein-conjugated acrolein, IL-6, CRP, Periventricular hyperintensity

22  
23  
24 48

25  
26  
27 49 **1. Introduction**

28  
29  
30 50 A number of large-scale clinical studies have demonstrated that white matter hyperintensities

31  
32  
33 51 (WMHs) are associated with high stroke risk<sup>1-3</sup>. The results of the large-scale, multicenter open trial

34  
35  
36 52 PICA study<sup>4</sup> conducted in Japan suggest that the Fazekas-classified periventricular hyperintensities

37  
38  
39 53 (PVHs) and deep-and-subcortical white matter hyperintensities (DSWMHs)<sup>5</sup> are related to the risk of

40  
41  
42 54 symptomatic brain infarction (SBI). In the Rotterdam Scan study on elderly subjects with no history

43  
44  
45 55 of stroke, conducted by magnetic resonance imaging (MRI) for 4.2 years, the proportional hazard

46  
47  
48 56 ratio of stroke occurrence after adjustment of comorbid factors was 4.7 (95% confidence interval

49  
50  
51 57 [CI], 2.0–11.2) in PVH and 3.6 (CI, 1.4–9.2) in DSWMH<sup>6</sup>. Unlike DSWMH, PVH is associated with

52  
53  
54 58 cognitive dysfunction<sup>7</sup>. In other studies, associations were separately assessed for PVH and DSWMH

55  
56  
57 59 and was significant only for PVH, which was related to decreased processing speed and executive



1  
2  
3  
4 60 function<sup>8 9</sup>. Additionally, PVH predicted poorer functional outcome after stroke both in the acute  
5  
6  
7 61 and chronic phases, independently of DSWMH<sup>10 11</sup>. A Chiba University group reported that the  
8  
9  
10 62 relative risk value (RRV) measured based on protein-conjugated acrolein (PC-Acro) together with  
11  
12  
13 63 interleukin-6 (IL-6) and C-reactive protein (CRP) can be used to predict the stroke risk factors of  
14  
15  
16 64 silent brain infarction (SBI), carotid atherosclerosis (CA), and WMH with high sensitivity and  
17  
18  
19 65 specificity<sup>12</sup>. We measured plasma PCAcro, IL-6 and CRP, analyzed the measurements in  
20  
21  
22 66 conjunction with age to determine whether it is possible to use the RRV to predict PVH and  
23  
24  
25 67 DSWMH.

## 26 27 68 2. Materials and methods

### 28 29 30 69 2.1. Subjects and blood sampling

31  
32  
33 70 We examined 228 **adult** volunteers (78 women and 150 men, age  $65.0 \pm 7.0$  years, range 31–83  
34  
35  
36 71 years). All these subjects were healthy volunteers living independently at home without apparent  
37  
38  
39 72 history of stroke, cardiovascular disease, or malignancy. Subjects with  $RRV > 0.5$  were enrolled  
40  
41  
42 73 prospectively. Informed consent was provided by each subject, and our study protocol was approved  
43  
44  
45 74 by the Ethics Committees of Nippon Medical School Hospital. Experiments were carried out in  
46  
47  
48 75 accordance with the Declaration of Helsinki principles. Blood samples were collected into tubes  
49  
50  
51 76 containing 3 U/mL heparin and centrifuged at  $1500 \times g$  for 10 min at 4°C.  
52

### 53 54 55 56 78 2.2. PC-Acro, IL-6, and CRP Measurements

1  
2  
3  
4 79 Blood samples were drawn from the antecubital vein after overnight fasting. PC-Acro  
5  
6  
7 80 [*N*-(3-formyl-3,4-dehydropiperidino)-lysine (FDPLysine) in protein] was determined as previously  
8  
9  
10 81 described<sup>13</sup> using an ACR-LYSINE ADDUCT ELISA SYSTEM (NOF Corporation, Tokyo, Japan)  
11  
12 82 and 0.01 mL plasma. IL-6 and CRP were quantified using an Endogen Human IL-6 ELISA kit  
13  
14 83 (Pierce Biotechnology, Inc., Rockford, IL, USA) and a human CRP ELISA kit (Alpha Diagnostic  
15  
16  
17 84 International, San Antonio, TX, USA), respectively, according to the manufacturers' protocols. After  
18  
19  
20  
21 85 the reaction was terminated, absorbance was measured at 450 nm using a microplate reader  
22  
23  
24 86 (MTP-800APC, Hitachi, Tokyo, Japan). The biochemical markers from each subject were measured  
25  
26  
27 87 by an investigator who was blinded to the MRI results (Amine Pharma Research Institute, Chiba,  
28  
29  
30 88 Japan). Relative risk value (RRV) was calculated with artificial neural networks by back propagation  
31  
32  
33 89 method using NEUROSIM/L software version 4 (Fujitsu, Tokyo, Japan)<sup>14</sup>. Using the report by a  
34  
35  
36 90 Chiba University group, we worked out predictive RRV in the range of 0–1<sup>12 15</sup>, with the nil as the  
37  
38  
39 91 lowest value as an index of the degree of tissue damage. Values > 0.5 were considered to indicate  
40  
41  
42 92 WMH risk.

43  
44 93  
45  
46 94 Standard enzymatic methods were used to measure the levels of serum total cholesterol,  
47  
48  
49 95 triglycerides, creatinine, and plasma glucose. Serum high-density lipoprotein (HDL) cholesterol level  
50  
51  
52 96 was measured with a direct method, and serum low-density lipoprotein (LDL) cholesterol level was  
53  
54  
55 97 calculated using Friedewald's formula in the 228 subjects with serum triglyceride levels < 400  
56  
57  
58 98 mg/dL<sup>16</sup>. Diabetes was defined as a fasting plasma glucose level  $\geq 126$  mg/dL or the use of

1  
2  
3 99 glucose-lowering medications. Dyslipidemia was defined as total cholesterol level  $\geq 220$  mg/dL,  
4  
5  
6 100 HDL cholesterol level  $< 40$  mg/dL and a triglyceride level  $\geq 150$  mg/dL, as well as the use of  
7  
8  
9 101 lipid-lowering medications. The estimated glomerular filtration rate (eGFR) was calculated for  
10  
11 102 Japanese men as recommended by the Japanese Society of Nephrology<sup>17</sup> and represented as: eGFR  
12  
13  
14 103  $(\text{mL}/\text{min}/1.73 \text{ m}^2) = 193 \times \text{serum creatinine}^{-1.094} \times \text{age}^{-0.287}$ .

### 17 104 2.3. Imaging

20 105 All 228 subjects underwent T1- and T2-weighted MRI and fluid-attenuated inversion recovery  
21  
22  
23 106 (FLAIR) at the Nippon Medical School Hospital, Japan, within 1 month after blood sampling. MRI  
24  
25  
26 107 was performed as described previously [10]. PVH and DSWMH were defined as hyperintense areas  
27  
28  
29 108 on T2 and FLAIR images without any abnormality on T1<sup>18</sup> in subjects without neurological signs  
30  
31  
32 109 and/or symptoms. The 228 subjects were classified into 103 PVH subjects (38 women and 65 men,  
33  
34  
35 110 aged  $68.2 \pm 6.0$  years, RRV  $0.75 \pm 0.11$ ) and 157 WMH subjects (61 women and 96 men, aged  $66.7$   
36  
37  
38 111  $\pm 5.8$  years, RRV  $0.71 \pm 0.12$ ). In more detail, 76 among all the subjects had both PVH and DSWMH,  
39  
40  
41 112 the other 23 having silent brain infarction. Also, 22 subjects had a complication of PVH and silent  
42  
43  
44 113 brain infarction, while in 20 subjects there was complication of DSWMH and silent brain infarction.

45  
46  
47 114

### 49 115 2.4. Statistics

51  
52  
53 116 All statistical tests were performed using the JMP9.02 software program (SAS Institute, Cary, NC,  
54  
55  
56 117 USA). Continuous variables except for triglyceride levels were expressed as means  $\pm$  standard

1  
2  
3  
4 118 deviation (SD). Triglyceride levels were transformed to the common logarithm for statistical analysis  
5  
6  
7 119 and are expressed as the geometric mean because of their skewed distribution. Categorical data are  
8  
9  
10 120 expressed as the number of subjects (percent of total). The clinical characteristics for each RRV  
11  
12 121 tertile were compared by analysis of variance (ANOVA) for continuous variables and  $\chi^2$  test for  
13  
14  
15 122 categorical variables. The RRVs between the two groups were compared by Student's t-tests or by  
16  
17  
18 123 ANOVA followed by multiple comparisons with the Bonferroni correction between the two groups.  
19  
20  
21 124 Correlations between RRV and other variables were evaluated with the Pearson's moment correlation  
22  
23  
24 125 coefficient. Factors with a P value < 0.05 as determined by Pearson's correlation analysis were  
25  
26  
27 126 included in a multiple linear regression analysis to identify independent determinants of the RRV.  
28  
29  
30 127 Logistic regression analysis was performed to obtain the odds ratios (ORs) for PVH and DSWMH in  
31  
32  
33 128 the three tertiles. All statistical tests were two-sided, and a P value < 0.05 was considered as  
34  
35  
36 129 significant.

37  
38  
39 13040  
41 131 3. Results

42  
43  
44 132 The study subjects were divided into tertiles according to RRV (0.50–0.62, 0.63–0.79, and 0.80–0.90  
45  
46  
47 133 from the lowest to highest tertile, respectively). The subjects' clinical characteristics are summarized  
48  
49  
50 134 in Table 1. The mean RRV of the entire subject population was  $0.71 \pm 0.13$ , and the mean age was 65  
51  
52  
53 135  $\pm 7$  years. Age, body mass index (BMI), diastolic blood pressure (BP), HDL cholesterol level,  
54  
55  
56 136 triglyceride level, eGFR, and current smoking status were significantly different among the groups.  
57  
58  
59  
60

1  
2  
3  
4 137 RRVs were significantly higher in subjects with older age, lower eGFR, or PVH (Table 1). A simple  
5  
6  
7 138 correlation analysis showed that RRV was significantly correlated with age, systolic BP, eGFR, and  
8  
9  
10 139 PVH (Table 2). Multiple linear regression analysis indicated that BMI ( $\beta = 0.0026$ ,  $P = 0.044$ ) and  
11  
12  
13 140 PVH ( $\beta = 0.0380$ ,  $P < 0.0001$ ) were significant independent determinants of RRV.

14  
15  
16 141 The results of logistic regression analysis of the association between PVH and RRV are shown in  
17  
18  
19 142 Table 3. Significant, unadjusted ORs for PVH were noted in the third RRV tertile (5.26 [95% CI,  
20  
21 143 2.66–10.78],  $P < 0.0001$ ), compared to the first tertile. After adjusting for model 1 (BMI, systolic BP,  
22  
23  
24 144 triglycerides, eGFR, and current smoking status) the ORs in the third RRV tertile remained  
25  
26  
27 145 significant (4.75 [95% CI, 2.33–10.05],  $P < 0.0001$ ). After adjusting for model 2, we found that the  
28  
29  
30 146 OR in the third RRV tertile 3 was significant (5.26 [95% CI, 2.65–10.83],  $P < 0.0001$ ). A significant  
31  
32  
33 147 relationship was observed between RRV and PVH ( $P < 0.05$ ) but no such significance was found  
34  
35  
36 148 between RRV and DSWMH (figure 1).

37  
38  
39 149

#### 40 41 150 4. Discussion

42  
43  
44 151 The present study demonstrated a significant, positive correlation between RRV and PVH in healthy  
45  
46  
47 152 Japanese volunteers. Notably, the highest RRV level tertile showed a significantly higher OR for a  
48  
49  
50 153 high predicted PVH risk in comparison to the lowest tertile, even after adjusting for multiple  
51  
52  
53 154 confounding factors. These results suggest that RRV is associated with the estimated risk of PVH in  
54  
55  
56 155 healthy Japanese volunteers. A number of clinical and epidemiological studies have examined the  
57  
58  
59  
60

1  
2  
3  
4 156 predictive value of RRV for the presence of WMH<sup>12 15</sup>. However, those studies assessed WMH  
5  
6  
7 157 prevalence; no studies have shown any significant association of RRV with PVH and DSWMH  
8  
9  
10 158 separately. In this regard, our results raise the possibility that RRV predicts the risk of PVH in the  
11  
12  
13 159 healthy Japanese population. With respect to age, these biochemical markers provide a good index of  
14  
15  
16 160 the presence of tissue damage related to PVH.

17  
18  
19 161 More recent studies focused on WMH location have reported that functional impairment within 1–3  
20  
21  
22 162 months after stroke correlated with PVH but not with DSWMH<sup>10 19</sup>. PVH WMH, especially PVH,  
23  
24  
25 163 has impacts on early functional recovery after ischemic stroke regardless of the initial stroke severity  
26  
27  
28 164 and other cardiovascular risk factors<sup>11</sup>. Other groups found a significant association between PVH  
29  
30  
31 165 and decreases in processing speed and executive function, but there was no such relationship with  
32  
33  
34 166 DSWMH<sup>8 9</sup>. Why PVH and DSWMH have different relationships with stroke outcome remains  
35  
36  
37 167 unclear, but several theories have been put forward. DSWMH predominantly disrupt short  
38  
39  
40 168 association fibers that link adjacent gyri, while PVH affects long association fibers that connect the  
41  
42  
43 169 more distant cortical areas<sup>20</sup>. Thus, lesions in various white matter locations may disconnect from  
44  
45  
46 170 different neural networks that affect neural repair processes after stroke<sup>21</sup>. In addition, PVHs are  
47  
48  
49 171 related to diminished cerebral vasomotor reactivity and subsequent occurrence of cerebral  
50  
51  
52 172 hypoperfusion<sup>22</sup>, while DSWMHs are generally associated with microangiopathy<sup>23</sup>. It is clear that  
53  
54  
55 173 regional hypoperfusion is a good predictor of functional outcome<sup>24</sup>. These findings shed light on  
56  
57  
58 174 why PVH can predict functional stroke outcome and specific cognitive functions<sup>11</sup>.

1  
2  
3  
4 175 Acrolein induces IL-6 production in astrocytes, macrophages, and endothelial cells, while IL-6  
5  
6  
7 176 induces CRP production in hepatocytes. Then, CRP stimulates IL-6 production, and IL-6 decreases  
8  
9  
10 177 acrolein toxicity <sup>25</sup>. Acrolein was thought to be one of the toxic compounds produced from  
11  
12  
13 178 unsaturated fatty acids by active oxygen species such as superoxide anion radical, hydrogen peroxide,  
14  
15  
16 179 and hydroxyl radical<sup>13</sup>. These findings may partially explain the pathophysiological mechanisms  
17  
18  
19 180 underlying the association between PVH and the three biomarkers assessed in the present study.  
20  
21 181 Further investigation will be needed for a better understanding of their interrelationship.  
22  
23

24 182

25  
26  
27 183 Our multiple linear regression analysis showed that RRV was independently associated with BMI  
28  
29  
30 184 and PVH. Although obesity is believed to be an independent cardiovascular risk factor <sup>26</sup>, it is still  
31  
32  
33 185 controversial whether BMI is a significant risk factor for stroke <sup>27 28</sup>. BMI was previously reported to  
34  
35  
36 186 be correlated with high RRV <sup>29</sup> which may be caused by vascular degeneration and endothelial  
37  
38  
39 187 dysfunction associated with hypertension and metabolic disorders. Subjects with metabolic  
40  
41  
42 188 syndrome are generally defined as those who have abdominal obesity and two additional metabolic  
43  
44  
45 189 disorders including hypertension, dyslipidemia, and hyperglycemia <sup>30 31</sup>.

46  
47 190

48  
49  
50 191 Our study has some potential limitations. Because it was a cross-sectional investigation, we could not  
51  
52  
53 192 determine a causal relationship between increased RRV and PVH risk. In addition, the population  
54  
55  
56 193 included healthy Japanese volunteers only. Therefore, it is unclear whether the results can be  
57  
58  
59  
60

1  
2  
3  
4 194 extrapolated to other populations of poor health, patients with cardiovascular diseases, or other  
5  
6  
7 195 ethnic groups. Despite these potential limitations, our findings support the conclusion that elevated  
8  
9  
10 196 RRV is significantly associated with PVH in healthy Japanese volunteers. These results suggest that  
11  
12  
13 197 RRV measurement may be useful for identifying PVH in the general population. This would allow  
14  
15  
16 198 clinicians to follow patients who may be at risk for stroke and cognitive dysfunction.

17  
18  
19 199

20  
21 200 Acknowledgments

22  
23  
24 201 We thank Drs. Mari Adachi and Sadaji Kura at Katsushika Health Center for assisting with the data  
25  
26  
27 202 analyses.  
28  
29  
30  
31  
32  
33  
34  
35  
36  
37  
38  
39  
40  
41  
42  
43  
44  
45  
46  
47  
48  
49  
50  
51  
52  
53  
54  
55  
56  
57  
58  
59  
60



Table 1. Characteristics of the study subjects due to their stroke risk marker level tertile

| Item                                        | All            | Silent brain infarction RRV tertile |                |               | P value* |
|---------------------------------------------|----------------|-------------------------------------|----------------|---------------|----------|
|                                             |                | Tertile 1                           | Tertile 2      | Tertile 3     |          |
| Subjects (n)                                | 228            | 76                                  | 73             | 79            | -        |
| Silent brain infarction relative risk value | 0.71 ± 0.13    | 0.51 ± 0.07**                       | 0.69 ± 0.05**  | 0.86 ± 0.03** | -        |
| Age (years)                                 | 65 ± 7         | 59 ± 7                              | 66 ± 3         | 70 ± 6        | <0.0001  |
| Male Sex                                    | 150 (65.7)     | 51 (67.1)                           | 52 (71.2)      | 47 (59.4)     | 0.299    |
| Body mass index, kg/m <sup>2</sup>          | 24.2 ± 6.4     | 23.2 ± 2.9                          | 24.6 ± 6.3     | 24.8 ± 8.6    | 0.133    |
| Systolic BP, mmHg                           | 123 ± 15       | 121 ± 14                            | 122 ± 14       | 126 ± 17      | 0.275    |
| Diastolic BP, mmHg                          | 75 ± 11        | 75 ± 9                              | 75 ± 10        | 75 ± 13       | 0.947    |
| Hypertension, n (%)                         | 81 (35.6)      | 23 (30.6)                           | 20 (27.4)      | 38 (48.1)     | 0.015    |
| Total cholesterol, mg/dL                    | 208 ± 32       | 208 ± 30                            | 208 ± 32       | 207 ± 34      | 0.903    |
| LDL cholesterol <sup>†</sup> , mg/dL        | 123 ± 29       | 123 ± 25                            | 123 ± 29       | 122 ± 33      | 0.848    |
| HDL cholesterol, mg/dL                      | 58 ± 15        | 59 ± 17                             | 57 ± 13        | 60 ± 16       | 0.385    |
| Triglycerides <sup>††</sup> , mg/dL         | 125 (113, 138) | 141 (111, 172)                      | 123 (105, 142) | 112 (99, 124) | 0.425    |

|                                    |             |             |             |             |         |
|------------------------------------|-------------|-------------|-------------|-------------|---------|
| Dyslipidemia, n (%)                | 55 (24.1)   | 19 (25.0)   | 13 (17.8)   | 23 (29.1)   | 0.259   |
| Fasting plasma glucose, mg/dL      | 100 ± 16    | 100 ± 14    | 99 ± 18     | 100 ± 15    | 0.754   |
| Diabetes, n (%)                    | 18 (7.8)    | 3 (3.9)     | 6 (8.2)     | 9 (11.3)    | 0.226   |
| eGFR (mL/min/1.73 m <sup>2</sup> ) | 67.6 ± 12.5 | 70.2 ± 15.3 | 67.3 ± 10.6 | 65.4 ± 10.6 | 0.027   |
| Current smoking status, n (%)      | 40 (17.5)   | 16 (21.0)   | 12 (16.4)   | 12 (15.1)   | 0.603   |
| PVH, n (%)                         | 103 (45.1)  | 18 (23.6)   | 36 (49.3)   | 49 (62.0)   | <0.0001 |
| DSWMH, n (%)                       | 157 (68.8)  | 52 (68.4)   | 50 (68.4)   | 55 (69.6)   | 0.983   |

\*Analysis of variance or chi-square test among the ADMA tertile. \*\*Range of a minimum-to-maximum stroke risk marker in each tertile. †n = 228. ††Geometric mean (95% confidence intervals). ‡Statistical analysis was not conducted because of the extremely small number of subjects in each category. BP, blood pressure; DSWMH, deep-and-subcortical white matter hyperintensity; eGFR, estimated glomerular filtration rate; HDL, high-density lipoprotein; LDL, low-density lipoprotein; PVH, periventricular hyperintensity; RRV, relative risk value

Table 2. Correlation coefficients and multiple linear regression analysis of relative risk value with the clinical parameters

| Item                             | Simple correlation analysis |         | Multiple linear regression analysis             |         |
|----------------------------------|-----------------------------|---------|-------------------------------------------------|---------|
|                                  | Correlation coefficient (r) | P-value | Standardized regression coefficient ( $\beta$ ) | P value |
| Age                              | 0.60                        | <0.0001 | †                                               |         |
| Male Sex                         | 0.05                        | 0.347   | ††                                              |         |
| BMI                              | 0.11                        | 0.075   | ††                                              |         |
| Systolic BP                      | 0.14                        | 0.026   | 0.0009                                          | 0.078   |
| Diastolic BP                     | 0.05                        | 0.382   | ††                                              |         |
| Total cholesterol                | -0.03                       | 0.618   | ††                                              |         |
| LDL cholesterol*                 | -0.02                       | 0.669   | ††                                              |         |
| HDL cholesterol                  | 0.02                        | 0.731   | ††                                              |         |
| Triglycerides**                  | -0.10                       | 0.130   | ††                                              |         |
| Fasting plasma glucose           | 0.01                        | 0.841   | ††                                              |         |
| eGFR                             | -0.13                       | 0.041   | -0.0009                                         | 0.173   |
| Current smoking status (Yes = 1) | -0.10                       | 0.115   | ††                                              |         |
| PVH (Yes = 1)                    | 0.26                        | <0.0001 | 0.0384                                          | <0.0001 |
| DSWMH (Yes = 1)                  | 0.02                        | 0.689   | ††                                              |         |

\* n = 228. \*\* Log-transformed value. † Not included in the multiple linear regression analysis to avoid multicollinearity with PVH relative risk value.

†† Not included in the multiple linear regression analysis because their P values were  $\geq 0.05$  in the simple correlation analysis. BMI, body mass index; BP, blood pressure; DSWMH, deep-and-subcortical white matter hyperintensity; eGFR, estimated glomerular filtration rate; HDL, high-density lipoprotein; LDL, low-density lipoprotein.

Table 3. Unadjusted and adjusted PVH ORs in each silent brain infarction relative risk value tertile

| Item      | Unadjusted |            |         | Adjusted* |            |         |
|-----------|------------|------------|---------|-----------|------------|---------|
|           | OR         | 95% CI     | P-value | OR        | 95% CI     | P value |
| Tertile 1 | 1.00       | reference  | -       | 1.00      | reference  | -       |
| Tertile 2 | 3.13       | 1.57–6.41  | 0.0014  | 3.01      | 1.50–6.20  | 0.0018  |
| Tertile 3 | 5.26       | 2.66–10.78 | <0.0001 | 4.87      | 2.43–10.08 | <0.0001 |

\* Adjusted for systolic BP and eGFR

BP, blood pressure; eGFR, estimated glomerular filtration rate; OR, odds ratio; PVH, periventricular hyperintensity

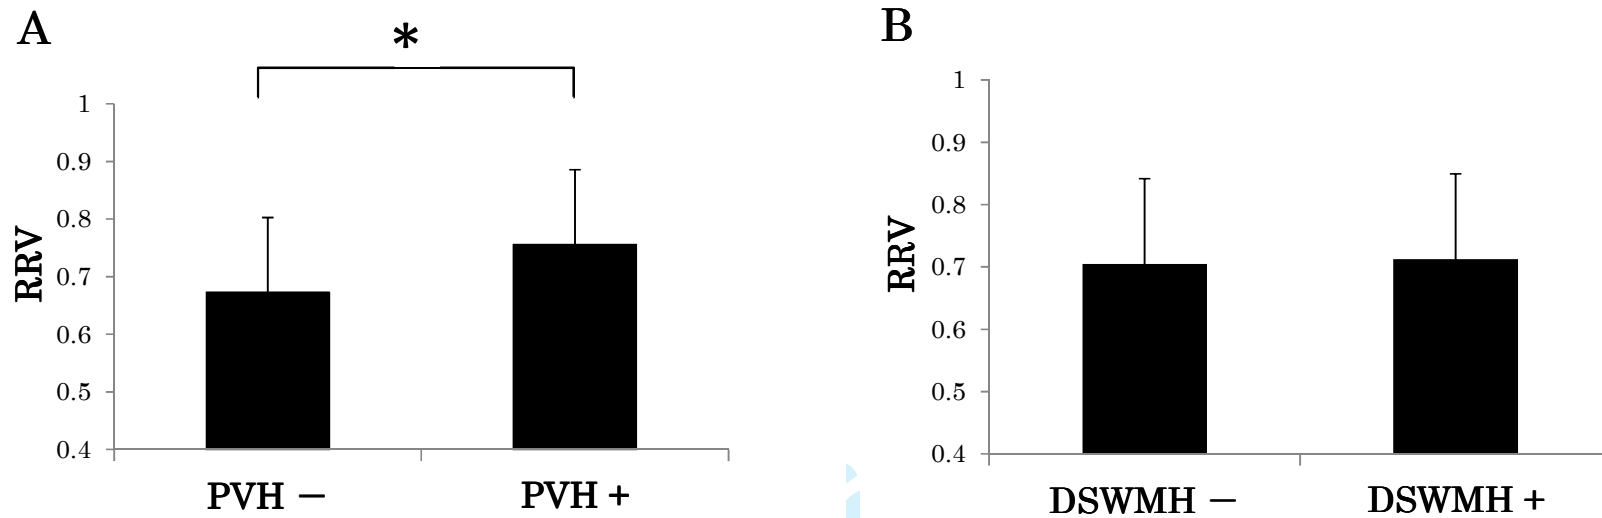

Figure 1. Correlation between the RRV and the PVH (A). Correlation between the RRV and DSWMH (B)

\*Significant at  $P < 0.05$

## References

1. Wong TY, Klein R, Sharrett AR, Couper DJ, Klein BE, Liao DP, et al. Cerebral white matter lesions, retinopathy, and incident clinical stroke. *Jama* 2002;288(1):67-74.
2. Gouw AA, van der Flier WM, Fazekas F, van Straaten EC, Pantoni L, Poggesi A, et al. Progression of white matter hyperintensities and incidence of new lacunes over a 3-year period: the Leukoaraiosis and Disability study. *Stroke* 2008;39(5):1414-20.
3. Bokura H, Yamaguchi S, Kobayashi S. Electrophysiological correlates for response inhibition in a Go/NoGo task. *Clin Neurophysiol* 2001;112(12):2224-32.
4. Shinohara Y, Tohgi H, Hirai S, Terashi A, Fukuuchi Y, Yamaguchi T, et al. Effect of the Ca antagonist nilvadipine on stroke occurrence or recurrence and extension of asymptomatic cerebral infarction in hypertensive patients with or without history of stroke (PICA Study). 1. Design and results at enrollment. *Cerebrovasc Dis* 2007;24(2-3):202-9.
5. Schmidt R, Fazekas F, Kapeller P, Schmidt H, Hartung HP. MRI white matter hyperintensities: three-year follow-up of the Austrian Stroke Prevention Study. *Neurology* 1999;53(1):132-9.
6. Vermeer SE, Hollander M, van Dijk EJ, Hofman A, Koudstaal PJ, Breteler MM. Silent brain infarcts and white matter lesions increase stroke risk in the general population: the Rotterdam Scan Study. *Stroke* 2003;34(5):1126-9.
7. Fukuda H, Kobayashi S, Okada K, Tsunematsu T. Frontal white matter lesions and dementia in lacunar infarction. *Stroke* 1990;21(8):1143-9.
8. van den Heuvel DM, ten Dam VH, de Craen AJ, Admiraal-Behloul F, Olofsen H, Bollen EL, et al. Increase in periventricular white matter hyperintensities parallels decline in mental processing speed in a non-demented elderly population. *J Neurol Neurosurg Psychiatry* 2006;77(2):149-53.
9. Debette S, Bombois S, Bruandet A, Delbeuck X, Lepoittevin S, Delmaire C, et al. Subcortical hyperintensities are associated with cognitive decline in patients with mild cognitive impairment. *Stroke* 2007;38(11):2924-30.
10. Kissela B, Lindsell CJ, Kleindorfer D, Alwell K, Moomaw CJ, Woo D, et al. Clinical prediction of functional outcome after ischemic stroke: the surprising importance of periventricular white matter disease and race. *Stroke* 2009;40(2):530-6.
11. Liou LM, Chen CF, Guo YC, Cheng HL, Lee HL, Hsu JS, et al. Cerebral white matter hyperintensities predict functional stroke outcome. *Cerebrovasc Dis* 2010;29(1):22-7.
12. Yoshida M, Tomitori H, Machi Y, Katagiri D, Ueda S, Horiguchi K, et al. Acrolein, IL-6 and CRP as markers of silent brain infarction. *Atherosclerosis* 2009;203(2):557-62.
13. Uchida K, Kanematsu M, Morimitsu Y, Osawa T, Noguchi N, Niki E. Acrolein is a product of lipid peroxidation reaction. Formation of free acrolein and its conjugate with lysine residues in oxidized low density lipoproteins. *J Biol Chem* 1998;273(26):16058-66.
14. Ellenius J, Groth T, Lindahl B, Wallentin L. Early assessment of patients with suspected acute myocardial infarction by biochemical monitoring and neural network analysis. *Clin Chem* 1997;43(10):1919-25.
15. Yoshida M, Higashi K, Kobayashi E, Saeki N, Wakui K, Kusaka T, et al. Correlation between images of silent brain infarction, carotid atherosclerosis and white matter hyperintensity, and plasma levels of acrolein, IL-6 and CRP. *Atherosclerosis* 2010;211(2):475-9.
16. Friedewald WT, Levy RI, Fredrickson DS. Estimation of the concentration of low-density lipoprotein cholesterol in plasma, without use of the preparative ultracentrifuge. *Clin Chem* 1972;18(6):499-502.
17. Matsuo S, Imai E, Horio M, Yasuda Y, Tomita K, Nitta K, et al. Revised equations for

- 1 estimated GFR from serum creatinine in Japan. *Am J Kidney Dis* 2009;53(6):982-92.
- 2 18. Fazekas F, Kleinert R, Offenbacher H, Payer F, Schmidt R, Kleinert G, et al. The  
3 morphologic correlate of incidental punctate white matter hyperintensities on MR  
4 images. *AJNR Am J Neuroradiol* 1991;12(5):915-21.
- 5 19. Kang HJ, Stewart R, Park MS, Bae KY, Kim SW, Kim JM, et al. White matter  
6 hyperintensities and functional outcomes at 2 weeks and 1 year after stroke.  
7 *Cerebrovasc Dis* 2013;35(2):138-45.
- 8 20. Brodal P. *The central nervous system : structure and function*. 3rd ed. Oxford: Oxford  
9 University Press, 2004.
- 10 21. Chollet F, DiPiero V, Wise RJ, Brooks DJ, Dolan RJ, Frackowiak RS. The functional  
11 anatomy of motor recovery after stroke in humans: a study with positron emission  
12 tomography. *Ann Neurol* 1991;29(1):63-71.
- 13 22. Gerdes VE, Kwa VI, ten Cate H, Brandjes DP, Buller HR, Stam J. Cerebral white matter  
14 lesions predict both ischemic strokes and myocardial infarctions in patients with  
15 established atherosclerotic disease. *Atherosclerosis* 2006;186(1):166-72.
- 16 23. Fazekas F, Kleinert R, Offenbacher H, Schmidt R, Kleinert G, Payer F, et al. Pathologic  
17 correlates of incidental MRI white matter signal hyperintensities. *Neurology*  
18 1993;43(9):1683-9.
- 19 24. Giubilei F, Lenzi GL, Di Piero V, Pozzilli C, Pantano P, Bastianello S, et al. Predictive  
20 value of brain perfusion single-photon emission computed tomography in acute  
21 ischemic stroke. *Stroke* 1990;21(6):895-900.
- 22 25. Saiki R, Hayashi D, Ikuo Y, Nishimura K, Ishii I, Kobayashi K, et al. Acrolein stimulates  
23 the synthesis of IL-6 and C-reactive protein (CRP) in thrombosis model mice and  
24 cultured cells. *J Neurochem* 2013.
- 25 26. Poirier P, Giles TD, Bray GA, Hong Y, Stern JS, Pi-Sunyer FX, et al. Obesity and  
26 cardiovascular disease: pathophysiology, evaluation, and effect of weight loss: an  
27 update of the 1997 American Heart Association Scientific Statement on Obesity and  
28 Heart Disease from the Obesity Committee of the Council on Nutrition, Physical  
29 Activity, and Metabolism. *Circulation* 2006;113(6):898-918.
- 30 27. Haapaniemi H, Hillbom M, Juvela S. Lifestyle-associated risk factors for acute brain  
31 infarction among persons of working age. *Stroke* 1997;28(1):26-30.
- 32 28. Rexrode KM, Hennekens CH, Willett WC, Colditz GA, Stampfer MJ, Rich-Edwards JW,  
33 et al. A prospective study of body mass index, weight change, and risk of stroke in  
34 women. *Jama* 1997;277(19):1539-45.
- 35 29. Yoshida M, Mizoi M, Saiki R, Kobayashi E, Saeki N, Wakui K, et al. Relationship  
36 between metabolic disorders and relative risk values of brain infarction estimated by  
37 protein-conjugated acrolein, IL-6 and CRP together with age. *Clin Chim Acta*  
38 2011;412(3-4):339-42.
- 39 30. Ninomiya JK, L'Italien G, Criqui MH, Whyte JL, Gamst A, Chen RS. Association of the  
40 metabolic syndrome with history of myocardial infarction and stroke in the Third  
41 National Health and Nutrition Examination Survey. *Circulation* 2004;109(1):42-6.
- 42 31. Kwon HM, Kim BJ, Lee SH, Choi SH, Oh BH, Yoon BW. Metabolic syndrome as an  
43 independent risk factor of silent brain infarction in healthy people. *Stroke*  
44 2006;37(2):466-70.
- 45  
46  
47  
48  
49  
50  
51  
52  
53  
54  
55  
56  
57  
58  
59  
60

1  
2  
3  
4  
5  
6  
7  
8  
9  
10  
11  
12  
13  
14  
15  
16  
17  
18  
19  
20  
21  
22  
23  
24  
25  
26  
27  
28  
29  
30  
31  
32  
33  
34  
35  
36  
37  
38  
39  
40  
41  
42  
43  
44  
45  
46  
47  
48  
49  
50  
51  
52  
53  
54  
55  
56  
57  
58  
59  
60

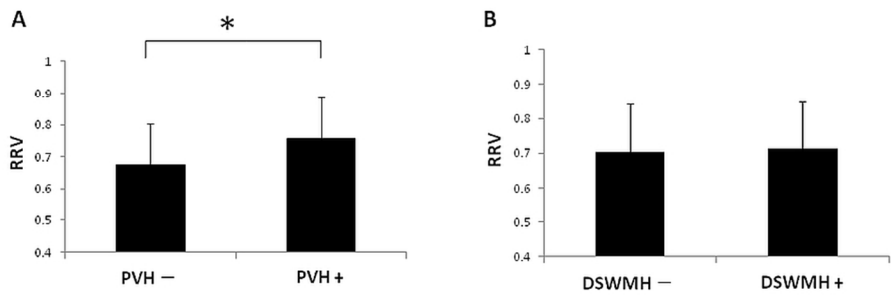

90x67mm (300 x 300 DPI)

ew only



STROBE 2007 (v4) Statement—Checklist of items that should be included in reports of *cohort studies*

| Section/Topic                | Item # | Recommendation                                                                                                                                                                       | Reported on page # |
|------------------------------|--------|--------------------------------------------------------------------------------------------------------------------------------------------------------------------------------------|--------------------|
| Title and abstract           | 1      | (a) Indicate the study's design with a commonly used term in the title or the abstract                                                                                               | Page3              |
|                              |        | (b) Provide in the abstract an informative and balanced summary of what was done and what was found                                                                                  | Page3              |
| <b>Introduction</b>          |        |                                                                                                                                                                                      |                    |
| Background/rationale         | 2      | Explain the scientific background and rationale for the investigation being reported                                                                                                 | Page4              |
| Objectives                   | 3      | State specific objectives, including any prespecified hypotheses                                                                                                                     | Page4              |
| <b>Methods</b>               |        |                                                                                                                                                                                      |                    |
| Study design                 | 4      | Present key elements of study design early in the paper                                                                                                                              | Page5              |
| Setting                      | 5      | Describe the setting, locations, and relevant dates, including periods of recruitment, exposure, follow-up, and data collection                                                      | Page5              |
| Participants                 | 6      | (a) Give the eligibility criteria, and the sources and methods of selection of participants. Describe methods of follow-up                                                           | Page5              |
|                              |        | (b) For matched studies, give matching criteria and number of exposed and unexposed                                                                                                  | Page5              |
| Variables                    | 7      | Clearly define all outcomes, exposures, predictors, potential confounders, and effect modifiers. Give diagnostic criteria, if applicable                                             | Page5-7            |
| Data sources/<br>measurement | 8*     | For each variable of interest, give sources of data and details of methods of assessment (measurement). Describe comparability of assessment methods if there is more than one group | Page6              |
| Bias                         | 9      | Describe any efforts to address potential sources of bias                                                                                                                            | NA                 |
| Study size                   | 10     | Explain how the study size was arrived at                                                                                                                                            | NA                 |
| Quantitative variables       | 11     | Explain how quantitative variables were handled in the analyses. If applicable, describe which groupings were chosen and why                                                         | Page7-8            |
| Statistical methods          | 12     | (a) Describe all statistical methods, including those used to control for confounding                                                                                                | Page7-8            |
|                              |        | (b) Describe any methods used to examine subgroups and interactions                                                                                                                  | NA                 |
|                              |        | (c) Explain how missing data were addressed                                                                                                                                          | NA                 |
|                              |        | (d) If applicable, explain how loss to follow-up was addressed                                                                                                                       | NA                 |
|                              |        | (e) Describe any sensitivity analyses                                                                                                                                                | NA                 |
| <b>Results</b>               |        |                                                                                                                                                                                      |                    |

|                          |     |                                                                                                                                                                                                              |         |
|--------------------------|-----|--------------------------------------------------------------------------------------------------------------------------------------------------------------------------------------------------------------|---------|
| Participants             | 13* | (a) Report numbers of individuals at each stage of study—eg numbers potentially eligible, examined for eligibility, confirmed eligible, included in the study, completing follow-up, and analysed            | NA      |
|                          |     | (b) Give reasons for non-participation at each stage                                                                                                                                                         | NA      |
|                          |     | (c) Consider use of a flow diagram                                                                                                                                                                           | NA      |
| Descriptive data         | 14* | (a) Give characteristics of study participants (eg demographic, clinical, social) and information on exposures and potential confounders                                                                     | Page4   |
|                          |     | (b) Indicate number of participants with missing data for each variable of interest                                                                                                                          | NA      |
|                          |     | (c) Summarise follow-up time (eg, average and total amount)                                                                                                                                                  | NA      |
| Outcome data             | 15* | Report numbers of outcome events or summary measures over time                                                                                                                                               | NA      |
| Main results             | 16  | (a) Give unadjusted estimates and, if applicable, confounder-adjusted estimates and their precision (eg, 95% confidence interval). Make clear which confounders were adjusted for and why they were included | Page8-9 |
|                          |     | (b) Report category boundaries when continuous variables were categorized                                                                                                                                    | Page8-9 |
|                          |     | (c) If relevant, consider translating estimates of relative risk into absolute risk for a meaningful time period                                                                                             | Page8-9 |
| Other analyses           | 17  | Report other analyses done—eg analyses of subgroups and interactions, and sensitivity analyses                                                                                                               | Page8-9 |
| <b>Discussion</b>        |     |                                                                                                                                                                                                              |         |
| Key results              | 18  | Summarise key results with reference to study objectives                                                                                                                                                     | Page8-9 |
| <b>Limitations</b>       |     |                                                                                                                                                                                                              |         |
| Interpretation           | 20  | Give a cautious overall interpretation of results considering objectives, limitations, multiplicity of analyses, results from similar studies, and other relevant evidence                                   | Page11  |
| Generalisability         | 21  | Discuss the generalisability (external validity) of the study results                                                                                                                                        | Page11  |
| <b>Other information</b> |     |                                                                                                                                                                                                              |         |
| Funding                  | 22  | Give the source of funding and the role of the funders for the present study and, if applicable, for the original study on which the present article is based                                                | NA      |

\*Give information separately for cases and controls in case-control studies and, if applicable, for exposed and unexposed groups in cohort and cross-sectional studies.

**Note:** An Explanation and Elaboration article discusses each checklist item and gives methodological background and published examples of transparent reporting. The STROBE checklist is best used in conjunction with this article (freely available on the Web sites of PLoS Medicine at <http://www.plosmedicine.org/>, Annals of Internal Medicine at <http://www.annals.org/>, and Epidemiology at <http://www.epidem.com/>). Information on the STROBE Initiative is available at [www.strobe-statement.org](http://www.strobe-statement.org).
